# Supplementary material
Source: publisher site journal article supplement (https://www.spandidos-publications.com/6163/downloadSupplementary)
Supplement: Supplementary file 1 [file downloadSupplementary]

## Sheet: Table SI
Table SI. Upregulated and downregulated genes in the high FANCD2 expression group compared with the low FANCD2 expression group.
	logFC	AveExpr	t	P.Value	adj.P.Val	B
HSPA5	0.903389	9.46946	28.0481	7.96014e-105	1.38562e-100	225.228
PDIA4	0.750414	8.73969	12.9647	2.33936e-33	2.03606e-29	64.7696
SURF4	0.481491	8.16171	12.1547	5.63459e-30	2.91828e-26	57.148
HSP90B1	0.552895	9.26159	12.1363	6.70599e-30	2.91828e-26	56.9776
HYOU1	0.716227	6.524	11.5881	1.11475e-27	3.8809e-24	51.9742
GPR107	0.58354	5.58739	11.3809	7.4434e-27	2.15945e-23	50.1167
ERP44	0.445675	5.84677	11.2984	1.57663e-26	3.92063e-23	49.3826
LAMC1	0.767411	6.75015	10.9873	2.5956e-25	5.64771e-22	46.643
UGGT1	0.52909	5.17994	10.8556	8.37177e-25	1.50844e-21	45.4979
TOR1B	0.452341	5.23379	10.849	8.87653e-25	1.50844e-21	45.4407
DNAJB11	0.628535	5.36354	10.8395	9.66085e-25	1.50844e-21	45.3579
FNDC3B	0.643569	5.25881	10.8311	1.03989e-24	1.50844e-21	45.2859
PDIA6	0.593152	7.75795	10.7435	2.25441e-24	3.01866e-21	44.5293
MSANTD3	0.559157	4.63335	10.5177	1.62735e-23	2.02338e-20	42.597
RAD23B	0.498516	7.26652	10.4944	1.99241e-23	2.31212e-20	42.3992
MAN1B1	0.466447	5.35569	10.4556	2.78941e-23	3.03471e-20	42.0703
DOLK	0.537511	5.16447	10.4335	3.37574e-23	3.45656e-20	41.8839
GLG1	0.546924	5.90569	10.3702	5.83272e-23	5.64057e-20	41.3494
TOR1A	0.433944	5.27764	10.3211	8.89439e-23	8.14866e-20	40.9371
PDIA3	0.478443	8.75387	10.1912	2.7051e-22	2.35438e-19	39.8502
P4HA1	0.71295	6.94996	10.1537	3.7202e-22	3.08369e-19	39.5388
MAPKAP1	0.42874	5.29202	10.1079	5.4914e-22	4.34494e-19	39.1584
QSOX2	0.614697	4.69128	10.0381	9.91217e-22	7.50179e-19	38.5814
DNAJC25	0.447688	3.76176	10.029	1.07005e-21	7.57296e-19	38.5067
NFE2L1	0.614552	7.68276	10.0271	1.08763e-21	7.57296e-19	38.4908
NPC1	0.640974	4.87315	10.0136	1.21879e-21	8.15981e-19	38.3795
EIF4G1	0.665521	8.30424	9.89233	3.37179e-21	2.17381e-18	37.3856
P4HB	0.489187	8.99471	9.88447	3.60074e-21	2.2385e-18	37.3214
PSMD2	0.657419	8.47931	9.83396	5.48785e-21	3.29403e-18	36.9099
SWI5	0.460255	4.78968	9.76855	9.45028e-21	5.48337e-18	36.3791
GOLGA2	0.535365	5.42452	9.75846	1.02753e-20	5.76973e-18	36.2974
SET	0.479095	8.15379	9.75453	1.06152e-20	5.77431e-18	36.2656
CALU	0.57355	7.22245	9.67495	2.04847e-20	1.08054e-17	35.6237
GAPVD1	0.434775	3.83262	9.53592	6.40513e-20	3.27924e-17	34.5108
GOLGA1	0.435748	3.97329	9.51713	7.46539e-20	3.6914e-17	34.3613
CALR	0.403961	10.1981	9.51439	7.6343e-20	3.6914e-17	34.3395
ATRN	0.672792	5.4799	9.46634	1.12847e-19	5.2485e-17	33.958
GTF3C4	0.559023	4.23291	9.46447	1.14576e-19	5.2485e-17	33.9432
FUBP3	0.468996	5.05817	9.46117	1.1768e-19	5.25245e-17	33.9171
ALG2	0.40349	5.26961	9.45685	1.21884e-19	5.30409e-17	33.8828
SETX	0.477192	4.47074	9.44481	1.34385e-19	5.70547e-17	33.7875
ADAM17	0.608232	4.36011	9.43272	1.48216e-19	6.14283e-17	33.6919
CD276	0.541095	6.36631	9.37405	2.38142e-19	9.64033e-17	33.2291
DAG1	0.485184	6.1647	9.36386	2.58531e-19	1.02278e-16	33.149
ECPAS	0.489547	5.42007	9.3562	2.74999e-19	1.06376e-16	33.0887
NCSTN	0.442467	7.11098	9.33035	3.3859e-19	1.28127e-16	32.8857
MOGS	0.456951	6.55158	9.32756	3.46279e-19	1.28249e-16	32.8638
YWHAG	0.495079	8.29712	9.3046	4.16385e-19	1.51e-16	32.6839
PLOD3	0.61658	5.807	9.27225	5.39668e-19	1.91714e-16	32.4309
MCFD2	0.457203	5.98171	9.25139	6.37672e-19	2.21999e-16	32.2681
INVS	0.449687	2.98806	9.23732	7.13517e-19	2.43533e-16	32.1584
DSG2	0.755062	7.34002	9.20783	9.02758e-19	3.02198e-16	31.9289
PPFIBP1	0.590895	4.41317	9.20392	9.31286e-19	3.05866e-16	31.8986
GFPT1	0.499107	5.35314	9.16864	1.23295e-18	3.97445e-16	31.6249
XPR1	0.626093	5.35729	9.12861	1.69376e-18	5.36058e-16	31.3151
ABITRAM	0.456231	4.95642	9.10297	2.07474e-18	6.4491e-16	31.1172
RC3H2	0.414067	4.13343	9.05689	2.98443e-18	8.98015e-16	30.7626
COPA	0.401585	6.99092	9.05657	2.99218e-18	8.98015e-16	30.7601
TARS1	0.525876	6.97393	9.05282	3.08164e-18	9.02092e-16	30.7314
GANAB	0.43317	8.60926	9.05169	3.10941e-18	9.02092e-16	30.7226
REXO4	0.440413	5.31339	9.02732	3.76622e-18	1.0664e-15	30.5357
NRBP1	0.35517	6.66703	9.02624	3.79828e-18	1.0664e-15	30.5275
P3H4	0.685552	5.32378	9.01899	4.02104e-18	1.11102e-15	30.4719
UBQLN1	0.408001	6.18222	8.98986	5.05362e-18	1.3587e-15	30.249
PSMD11	0.540876	6.32115	8.98935	5.07355e-18	1.3587e-15	30.2452
PCYOX1	0.492486	6.02136	8.98029	5.44675e-18	1.43654e-15	30.176
FAM120A	0.420527	6.58403	8.96639	6.07294e-18	1.57779e-15	30.0698
PSMB7	0.410579	7.77712	8.96239	6.26595e-18	1.60399e-15	30.0393
IARS1	0.495425	6.09971	8.95722	6.52429e-18	1.64592e-15	29.9999
PPP6C	0.348725	5.71801	8.94641	7.09897e-18	1.76531e-15	29.9176
PELO	0.395061	4.4675	8.94123	7.39198e-18	1.79665e-15	29.8782
DOLPP1	0.464231	5.28877	8.94055	7.43141e-18	1.79665e-15	29.873
SERPINH1	0.623479	7.36069	8.92856	8.16037e-18	1.94586e-15	29.7818
MFSD14B	0.41493	6.23776	8.85302	1.46816e-17	3.45355e-15	29.2092
NTMT1	0.407348	3.92301	8.84818	1.52431e-17	3.53783e-15	29.1726
DDX31	0.413381	3.57529	8.8375	1.65577e-17	3.79237e-15	29.092
AARS1	0.496749	6.00296	8.83527	1.68466e-17	3.80842e-15	29.0751
RAB14	0.389967	6.62979	8.83012	1.75309e-17	3.91231e-15	29.0363
TMEM250	0.450523	5.71853	8.78896	2.40932e-17	5.26479e-15	28.7264
PIK3CA	0.576347	3.47249	8.78841	2.41962e-17	5.26479e-15	28.7222
RNF20	0.462708	5.31713	8.77923	2.59712e-17	5.58125e-15	28.6532
TSR1	0.485641	4.90524	8.73826	3.55923e-17	7.55554e-15	28.3461
PIGS	0.499038	5.69651	8.68928	5.18101e-17	1.08658e-14	27.9802
PSMD1	0.340893	4.818	8.68633	5.29957e-17	1.09821e-14	27.9581
C9orf78	0.377187	5.31383	8.67002	6.00315e-17	1.22937e-14	27.8367
FBXW2	0.410149	4.43717	8.64492	7.27026e-17	1.47155e-14	27.6501
ATF6	0.375625	5.05883	8.61793	8.92885e-17	1.78649e-14	27.4498
SUSD1	0.509865	3.60441	8.59892	1.03165e-16	2.04067e-14	27.3091
TRIB3	0.89769	5.45478	8.58373	1.15764e-16	2.26416e-14	27.1968
TMEM214	0.333429	6.38721	8.52616	1.7894e-16	3.4609e-14	26.7726
CAMSAP2	0.497219	4.98289	8.51134	2.00102e-16	3.8249e-14	26.6637
UXS1	0.415323	5.00697	8.50999	2.02155e-16	3.8249e-14	26.6538
DENND1A	0.449158	3.36775	8.50402	2.11453e-16	3.9578e-14	26.61
ELP1	0.414047	3.07457	8.50247	2.13938e-16	3.96172e-14	26.5986
DNAJB4	0.635509	4.50601	8.48853	2.37605e-16	4.35368e-14	26.4964
SLC30A6	0.377036	5.01035	8.47564	2.61788e-16	4.74683e-14	26.402
PLOD1	0.618475	7.117	8.45937	2.95812e-16	5.30845e-14	26.283
RBM18	0.372881	4.40719	8.4476	3.23096e-16	5.7389e-14	26.1971
WDR5	0.472471	5.8807	8.44142	3.38416e-16	5.95031e-14	26.152
PDCL	0.405987	4.72067	8.4206	3.95493e-16	6.87017e-14	26.0002
TTF1	0.433316	4.17283	8.41955	3.98625e-16	6.87017e-14	25.9925
RABEPK	0.3926	4.66642	8.41819	4.0268e-16	6.87201e-14	25.9827
EXT2	0.473991	5.17853	8.41575	4.10111e-16	6.93087e-14	25.9649
ARPC5L	0.360062	5.80766	8.40674	4.38667e-16	7.34218e-14	25.8993
SLMAP	0.316573	3.52909	8.37296	5.64388e-16	9.32435e-14	25.6539
PTPA	0.346374	6.29161	8.37214	5.67807e-16	9.32435e-14	25.6481
TRIM32	0.453619	4.33191	8.3516	6.61583e-16	1.07628e-13	25.4992
ARCN1	0.374288	7.25003	8.3473	6.83094e-16	1.09357e-13	25.4681
NMT1	0.343216	5.73274	8.34685	6.85383e-16	1.09357e-13	25.4648
INTS13	0.456865	5.52169	8.34574	6.91061e-16	1.09357e-13	25.4568
STT3B	0.340791	6.81687	8.34356	7.02318e-16	1.10137e-13	25.4411
TMEM203	0.365334	6.34209	8.33153	7.67967e-16	1.19357e-13	25.3541
ISG20L2	0.388061	5.44905	8.32159	8.26702e-16	1.27349e-13	25.2823
NUP214	0.424005	4.15797	8.3175	8.52142e-16	1.30116e-13	25.2528
CDCP1	0.643559	5.60429	8.31467	8.70229e-16	1.31722e-13	25.2324
CANX	0.39556	8.2453	8.30028	9.68107e-16	1.44038e-13	25.1286
ACBD3	0.385577	6.13654	8.30027	9.68144e-16	1.44038e-13	25.1286
CERS2	0.422829	5.80448	8.29242	1.02608e-15	1.51364e-13	25.072
PRRC2B	0.654783	5.58744	8.27632	1.15571e-15	1.69054e-13	24.9562
PRPF4	0.505886	5.4909	8.24928	1.41078e-15	2.02909e-13	24.7621
MRPL19	0.36667	4.32086	8.24833	1.42069e-15	2.02909e-13	24.7552
FKBP9	0.64613	6.73644	8.2482	1.42213e-15	2.02909e-13	24.7543
SPTLC1	0.371867	5.41388	8.24268	1.48109e-15	2.09604e-13	24.7147
HNRNPK	0.283423	8.49257	8.23526	1.56427e-15	2.19591e-13	24.6615
ACTR3	0.391201	6.64052	8.22387	1.70098e-15	2.36872e-13	24.58
STC2	0.937042	4.46621	8.19378	2.12133e-15	2.91156e-13	24.3651
NAA35	0.405378	3.80403	8.1936	2.12425e-15	2.91156e-13	24.3637
COLGALT1	0.462922	7.1203	8.17765	2.38754e-15	3.24687e-13	24.25
TMEM245	0.45191	4.72199	8.17558	2.42394e-15	3.27081e-13	24.2353
ACLY	0.469931	6.81424	8.16568	2.60601e-15	3.48945e-13	24.1648
CDC26	0.391603	4.56477	8.16205	2.67603e-15	3.55248e-13	24.139
TMEM43	0.365806	6.48061	8.16114	2.6939e-15	3.55248e-13	24.1325
SEC16A	0.458097	5.38489	8.15839	2.7486e-15	3.59736e-13	24.113
GLE1	0.439983	5.29318	8.14938	2.93552e-15	3.81332e-13	24.049
DNAJC10	0.407095	4.19452	8.14603	3.00828e-15	3.8789e-13	24.0251
ERGIC2	0.382743	4.93483	8.14415	3.04996e-15	3.90373e-13	24.0117
ROCK2	0.454351	4.23218	8.14055	3.1311e-15	3.96259e-13	23.9862
OSMR	0.756559	5.9315	8.14009	3.14148e-15	3.96259e-13	23.983
RAB3GAP1	0.36283	5.21473	8.13464	3.26905e-15	4.09384e-13	23.9442
STT3A	0.381467	6.3425	8.13007	3.37966e-15	4.20213e-13	23.9119
TMEM158	1.00195	4.5543	8.12282	3.56301e-15	4.39868e-13	23.8605
PTBP3	0.393924	6.12379	8.12035	3.62781e-15	4.44713e-13	23.8429
SENP2	0.55622	5.31268	8.09854	4.25149e-15	5.14696e-13	23.6886
YEATS2	0.656937	5.23662	8.09834	4.25784e-15	5.14696e-13	23.6871
ABL1	0.45712	5.39672	8.08774	4.59864e-15	5.4686e-13	23.6122
OS9	0.369563	7.17572	8.08737	4.61084e-15	5.4686e-13	23.6096
DPM2	0.353397	6.12636	8.08715	4.61817e-15	5.4686e-13	23.6081
CDK9	0.344766	6.07489	8.08402	4.72439e-15	5.55659e-13	23.586
SEC23B	0.363004	6.0297	8.07822	4.92761e-15	5.73713e-13	23.545
BMS1	0.412324	4.83255	8.07762	4.94913e-15	5.73713e-13	23.5408
SHC1	0.551197	6.66192	8.07685	4.97677e-15	5.73713e-13	23.5353
FXR1	0.572512	6.013	8.07494	5.04614e-15	5.76532e-13	23.5219
NCBP1	0.413501	4.9517	8.07436	5.06746e-15	5.76532e-13	23.5178
BICD1	0.463213	2.54943	8.0727	5.12891e-15	5.79733e-13	23.5061
NUP188	0.463227	5.22083	8.06296	5.50411e-15	6.18129e-13	23.4374
FKTN	0.336258	2.08579	8.04896	6.09086e-15	6.79638e-13	23.3388
BRD3OS	0.45622	3.32811	8.04612	6.21753e-15	6.89354e-13	23.3188
TNPO1	0.45138	5.1184	8.04237	6.38853e-15	7.0383e-13	23.2924
SLC44A1	0.50363	5.66296	8.03539	6.71878e-15	7.28589e-13	23.2434
CIZ1	0.399347	5.25734	8.03502	6.73675e-15	7.28589e-13	23.2408
LRRC59	0.373422	6.85303	8.03498	6.73883e-15	7.28589e-13	23.2405
CKAP4	0.497151	7.68174	8.02257	7.37092e-15	7.9201e-13	23.1533
RPN2	0.383158	9.19583	8.02122	7.44271e-15	7.94817e-13	23.1439
ALG3	0.572658	6.79689	8.01744	7.64865e-15	8.11829e-13	23.1173
WNT3	0.650137	2.4947	8.01356	7.86561e-15	8.29798e-13	23.0901
PDIA5	0.427962	5.17192	8.00906	8.12531e-15	8.52031e-13	23.0585
PAK2	0.450639	6.8171	8.00062	8.63449e-15	9.00003e-13	22.9994
ZBTB43	0.429438	3.36911	7.98373	9.75062e-15	1.0025e-12	22.8812
AMMECR1L	0.342379	4.84028	7.98332	9.77985e-15	1.0025e-12	22.8783
CCT7	0.371741	8.19401	7.98316	9.79062e-15	1.0025e-12	22.8772
ATP2A2	0.435292	6.97129	7.97738	1.02059e-14	1.03891e-12	22.8368
GOSR1	0.363321	4.18415	7.96903	1.08371e-14	1.09676e-12	22.7784
FAM120AOS	0.386725	4.2981	7.96594	1.10801e-14	1.11487e-12	22.7569
CDC27	0.351446	5.14795	7.95999	1.15639e-14	1.15686e-12	22.7153
LRP12	0.736925	3.65645	7.94785	1.26154e-14	1.25484e-12	22.6307
KPNB1	0.398088	6.38547	7.93523	1.38087e-14	1.36573e-12	22.5428
PSME3	0.386211	6.62666	7.93034	1.43013e-14	1.40645e-12	22.5087
XPOT	0.5016	6.32833	7.9265	1.46995e-14	1.43275e-12	22.482
GORASP2	0.291409	6.67707	7.92499	1.48592e-14	1.43275e-12	22.4715
MBTPS2	0.422381	3.48269	7.92389	1.49763e-14	1.43275e-12	22.4639
TRAM2	0.493381	4.90105	7.92389	1.49765e-14	1.43275e-12	22.4638
UBE2H	0.480974	6.58982	7.92385	1.49802e-14	1.43275e-12	22.4636
NRSN2	0.533608	5.61534	7.91537	1.59174e-14	1.51406e-12	22.4046
SPIN1	0.391341	5.99996	7.90866	1.66978e-14	1.57966e-12	22.3581
MED22	0.395656	3.96874	7.87616	2.1053e-14	1.98092e-12	22.1327
AP2B1	0.497197	6.55034	7.87284	2.15564e-14	2.01738e-12	22.1098
ANKRD52	0.48462	4.75524	7.85734	2.4068e-14	2.24038e-12	22.0026
ADCY3	0.564219	4.65987	7.85079	2.52151e-14	2.33194e-12	21.9573
EPRS1	0.40399	6.70327	7.8502	2.53195e-14	2.33194e-12	21.9533
DVL3	0.62152	7.06803	7.84932	2.54786e-14	2.33424e-12	21.9472
RABEP1	0.387233	3.99448	7.84794	2.57305e-14	2.34498e-12	21.9377
NOMO1	0.448066	5.25128	7.84695	2.59104e-14	2.34908e-12	21.9309
DNM1L	0.398596	5.40158	7.83999	2.72236e-14	2.45534e-12	21.8828
POFUT1	0.445973	5.7353	7.83802	2.76067e-14	2.47706e-12	21.8693
ODF2	0.424814	4.67154	7.83404	2.83967e-14	2.53488e-12	21.8418
RIF1	0.387768	3.68378	7.82922	2.93828e-14	2.60952e-12	21.8087
RFT1	0.280372	3.58373	7.8244	3.0405e-14	2.6866e-12	21.7754
STRN	0.376972	3.7713	7.81823	3.17625e-14	2.79237e-12	21.733
CLTC	0.337914	6.96249	7.81714	3.2008e-14	2.79982e-12	21.7255
LPAR1	0.750666	4.39448	7.80822	3.40937e-14	2.96735e-12	21.6641
MAP1B	1.10042	4.21649	7.7869	3.9636e-14	3.43255e-12	21.5177
ZBTB34	0.419396	3.06662	7.78319	4.06876e-14	3.50619e-12	21.4923
SEMA4F	0.556236	3.59052	7.77826	4.21263e-14	3.61228e-12	21.4585
MYO10	0.693663	4.81146	7.77376	4.34861e-14	3.7106e-12	21.4276
KLHL42	0.519518	4.30302	7.76652	4.57624e-14	3.88578e-12	21.378
CTNNB1	0.410555	6.88884	7.76132	4.74684e-14	4.01108e-12	21.3425
LIMK1	0.435177	5.36576	7.75539	4.94901e-14	4.16171e-12	21.3019
CKAP2L	0.507015	3.57687	7.74631	5.27564e-14	4.41505e-12	21.2398
OXSR1	0.344817	4.9425	7.73268	5.80552e-14	4.82081e-12	21.1468
CUL1	0.360762	6.14003	7.73181	5.84123e-14	4.82081e-12	21.1409
MYO1C	0.428576	6.14926	7.73112	5.86967e-14	4.82081e-12	21.1361
NCKAP1	0.392818	5.22139	7.73108	5.87127e-14	4.82081e-12	21.1359
TMEM127	0.333899	6.0999	7.72912	5.95263e-14	4.86467e-12	21.1225
JOSD1	0.388212	6.50799	7.71445	6.59777e-14	5.3667e-12	21.0225
RNF216	0.367957	4.94324	7.71097	6.76051e-14	5.47349e-12	20.9988
PAFAH1B1	0.324638	4.82048	7.70931	6.83974e-14	5.51201e-12	20.9875
ZNF746	0.484482	3.73317	7.70818	6.89402e-14	5.53015e-12	20.9798
PPME1	0.440944	5.14163	7.70206	7.196e-14	5.74591e-12	20.9382
GALNT3	0.569664	5.46469	7.70066	7.26656e-14	5.77575e-12	20.9287
PTPN3	0.478607	3.74919	7.68713	7.98789e-14	6.32023e-12	20.8368
TBC1D13	0.406182	4.83431	7.68033	8.3765e-14	6.59773e-12	20.7906
ZNF484	0.358727	2.38722	7.67847	8.48614e-14	6.65397e-12	20.778
ASB6	0.315915	4.31497	7.67535	8.67326e-14	6.7702e-12	20.7568
MLEC	0.355797	6.34334	7.66644	9.22925e-14	7.17203e-12	20.6964
RBBP8	0.57511	5.56868	7.6636	9.41424e-14	7.28328e-12	20.6771
DDIT3	0.604109	5.31509	7.66198	9.52132e-14	7.33353e-12	20.6662
RANBP2	0.385344	4.92974	7.65906	9.71666e-14	7.45101e-12	20.6464
EIF2AK2	0.43185	4.89453	7.65741	9.82898e-14	7.50408e-12	20.6353
LDHA	0.483737	8.97787	7.65309	1.01299e-13	7.70001e-12	20.606
RABGAP1	0.416432	4.81595	7.65246	1.01742e-13	7.7001e-12	20.6017
DUSP3	0.338586	5.68749	7.63508	1.14822e-13	8.65244e-12	20.4842
PLBD2	0.436433	6.2897	7.6322	1.17145e-13	8.78938e-12	20.4648
SMYD5	0.375335	5.45117	7.6302	1.18782e-13	8.874e-12	20.4513
SLC16A1	0.713566	5.93972	7.62492	1.23223e-13	9.16641e-12	20.4157
SLC30A5	0.282586	4.58543	7.62011	1.27411e-13	9.43762e-12	20.3832
EHBP1	0.506644	4.41772	7.61785	1.29428e-13	9.54638e-12	20.3679
EIF5A2	0.681708	3.56719	7.61284	1.34007e-13	9.84246e-12	20.3342
CERCAM	0.610494	5.22886	7.61219	1.34606e-13	9.8449e-12	20.3298
KIRREL1	0.666871	4.5353	7.60898	1.37639e-13	1.00246e-11	20.3082
LCLAT1	0.423347	3.90781	7.60596	1.40549e-13	1.01939e-11	20.2879
CSNK2A1	0.377043	4.09428	7.603	1.43467e-13	1.03624e-11	20.2679
TVP23B	0.383944	3.98607	7.60219	1.44272e-13	1.03775e-11	20.2625
EIF4H	0.335288	7.24219	7.59874	1.47767e-13	1.05851e-11	20.2392
DOCK7	0.348726	2.61645	7.59767	1.48867e-13	1.06202e-11	20.232
EMC1	0.401595	5.24971	7.59481	1.51842e-13	1.07882e-11	20.2128
MSH6	0.511037	4.99556	7.58203	1.65888e-13	1.17139e-11	20.1269
SLC7A5	0.833426	7.39579	7.58174	1.66217e-13	1.17139e-11	20.125
XYLT2	0.457018	5.18059	7.57775	1.70867e-13	1.1993e-11	20.0982
ALKBH5	0.382463	6.53051	7.56941	1.81014e-13	1.26512e-11	20.0421
GALNT2	0.541855	5.76785	7.56886	1.81697e-13	1.26512e-11	20.0385
DDX18	0.363293	5.65633	7.5625	1.89858e-13	1.31434e-11	19.9958
PIP4K2C	0.351027	6.28668	7.56218	1.90277e-13	1.31434e-11	19.9937
DARS1	0.373835	6.30504	7.55809	1.95728e-13	1.34665e-11	19.9662
HSPA1B	0.610554	7.08877	7.55746	1.96571e-13	1.34713e-11	19.9621
TEX10	0.421075	4.02372	7.55414	2.01132e-13	1.37298e-11	19.9398
CCDC127	0.379338	3.46639	7.54908	2.08266e-13	1.41613e-11	19.906
SLC16A13	0.547414	3.74171	7.54591	2.12875e-13	1.43605e-11	19.8847
ARNTL2	0.719476	5.07359	7.54549	2.13489e-13	1.43605e-11	19.8819
CEBPZ	0.409789	5.31285	7.54524	2.13859e-13	1.43605e-11	19.8802
PLS3	0.474577	7.92453	7.54481	2.14495e-13	1.43605e-11	19.8773
B4GALNT1	0.881603	2.41522	7.54217	2.18425e-13	1.45617e-11	19.8597
ASAP1	0.436663	4.82619	7.54167	2.19175e-13	1.45617e-11	19.8564
RECQL	0.467222	4.7489	7.53755	2.25496e-13	1.49248e-11	19.8288
RAB11FIP5	0.450509	4.46687	7.53385	2.31305e-13	1.52512e-11	19.8041
YARS2	0.375804	4.96493	7.53153	2.35023e-13	1.53808e-11	19.7886
NELFB	0.351232	6.75347	7.53153	2.35038e-13	1.53808e-11	19.7885
SMG7	0.408185	5.86488	7.52982	2.37809e-13	1.55039e-11	19.7771
DHX9	0.33992	7.05262	7.52918	2.38869e-13	1.55149e-11	19.7728
GNA12	0.406375	5.63826	7.52602	2.44112e-13	1.57965e-11	19.7517
LARP4	0.324993	4.73358	7.52139	2.52009e-13	1.62471e-11	19.7208
NIPA1	0.464061	3.84951	7.51699	2.59751e-13	1.6629e-11	19.6915
LASP1	0.360516	6.54378	7.51678	2.60116e-13	1.6629e-11	19.6901
ETV5	0.824984	4.66985	7.5164	2.60799e-13	1.6629e-11	19.6875
ZC3H15	0.330224	6.54163	7.51324	2.66521e-13	1.69319e-11	19.6665
TOR1AIP1	0.330763	5.4438	7.51151	2.69711e-13	1.70722e-11	19.6549
NUFIP2	0.405788	5.174	7.50964	2.73203e-13	1.71838e-11	19.6424
LSM12	0.354649	3.96743	7.50951	2.73448e-13	1.71838e-11	19.6416
GCC1	0.390869	4.43719	7.50582	2.80458e-13	1.75609e-11	19.617
TMEM41A	0.463809	4.86222	7.50393	2.84115e-13	1.77261e-11	19.6044
FBN2	1.43935	2.72712	7.50316	2.85627e-13	1.77568e-11	19.5993
AATF	0.396694	5.67871	7.49357	3.05033e-13	1.88958e-11	19.5354
IGF2R	0.49152	5.18608	7.48958	3.13497e-13	1.93512e-11	19.5089
IARS2	0.380998	6.95985	7.48472	3.24118e-13	1.99138e-11	19.4765
CSNK2A2	0.359229	3.63715	7.48436	3.249e-13	1.99138e-11	19.4742
DIP2B	0.533812	5.16543	7.47998	3.34807e-13	2.04491e-11	19.445
SEC62	0.426022	6.25548	7.47078	3.5655e-13	2.17009e-11	19.3839
APMAP	0.431051	8.02787	7.46409	3.73252e-13	2.26383e-11	19.3395
SLC3A2	0.545729	7.55541	7.46144	3.80065e-13	2.29715e-11	19.3219
ENTR1	0.369039	5.51328	7.45716	3.91343e-13	2.35713e-11	19.2936
FASTKD5	0.409757	4.76963	7.453	4.026e-13	2.41657e-11	19.266
POM121C	0.427782	4.47209	7.45158	4.06522e-13	2.43173e-11	19.2566
NEMP1	0.509906	4.84542	7.44773	4.17353e-13	2.48797e-11	19.2311
F11R	0.47875	7.42761	7.44438	4.27013e-13	2.53687e-11	19.2089
SLC4A1AP	0.31091	4.76954	7.44281	4.31592e-13	2.54596e-11	19.1985
UBXN7	0.535221	4.75598	7.44241	4.32767e-13	2.54596e-11	19.1959
POGLUT3	0.4709	5.28955	7.44236	4.32931e-13	2.54596e-11	19.1955
EFTUD2	0.354404	5.644	7.44172	4.34809e-13	2.54839e-11	19.1913
UBXN2A	0.365578	4.09382	7.43603	4.52019e-13	2.64037e-11	19.1536
RNF26	0.421285	5.67728	7.43518	4.54651e-13	2.64686e-11	19.148
ARHGAP21	0.452135	4.44168	7.43206	4.64401e-13	2.69461e-11	19.1274
HSPD1	0.458964	7.50269	7.43087	4.68205e-13	2.70766e-11	19.1195
SLC39A14	0.514803	5.19609	7.4303	4.70024e-13	2.70917e-11	19.1157
P4HA2	0.504201	4.55362	7.42131	4.9968e-13	2.87061e-11	19.0564
ADIPOR2	0.398253	6.2421	7.42059	5.02117e-13	2.87512e-11	19.0516
ANP32B	0.407998	8.35551	7.41898	5.07672e-13	2.89739e-11	19.041
PRXL2C	0.395143	3.90255	7.41766	5.12249e-13	2.91396e-11	19.0322
MARS1	0.336084	6.10501	7.40228	5.68676e-13	3.22441e-11	18.9308
HSPH1	0.441541	5.93307	7.39049	6.16051e-13	3.48169e-11	18.8532
PTPN12	0.411083	6.05539	7.38653	6.32796e-13	3.56475e-11	18.8271
EXT1	0.494296	5.46374	7.37843	6.68507e-13	3.75378e-11	18.7739
NCS1	0.567378	4.89019	7.37382	6.89734e-13	3.86051e-11	18.7435
ZFAND3	0.339697	6.19827	7.3698	7.08748e-13	3.95422e-11	18.7172
PSMD3	0.398275	6.98972	7.35534	7.81537e-13	4.34146e-11	18.6223
ESF1	0.462872	4.77872	7.35504	7.83145e-13	4.34146e-11	18.6203
FUT11	0.365034	3.94227	7.3539	7.8922e-13	4.36125e-11	18.6128
ASAP2	0.565988	3.68497	7.35148	8.02234e-13	4.41914e-11	18.5969
NKIRAS2	0.336429	5.24995	7.35035	8.08369e-13	4.43889e-11	18.5895
NOMO2	0.458701	3.12384	7.34531	8.36342e-13	4.57661e-11	18.5565
RAB1A	0.282209	7.72868	7.34457	8.40535e-13	4.57661e-11	18.5517
MAP3K2	0.314791	4.40826	7.34443	8.41336e-13	4.57661e-11	18.5508
TAF1A	0.395341	3.30533	7.34309	8.48994e-13	4.60388e-11	18.542
CAPN7	0.321158	4.13864	7.34004	8.66632e-13	4.68492e-11	18.522
ZFYVE9	0.426465	3.58004	7.33612	8.89838e-13	4.78191e-11	18.4964
PCYT1A	0.525364	5.65831	7.33596	8.90811e-13	4.78191e-11	18.4953
MGAT5	0.510318	5.04371	7.33544	8.93916e-13	4.78191e-11	18.4919
NSFL1C	0.349614	5.73373	7.33517	8.9556e-13	4.78191e-11	18.4902
CPLANE1	0.434798	2.21534	7.33407	9.02234e-13	4.80281e-11	18.483
TMTC3	0.497062	5.15659	7.3335	9.05679e-13	4.80645e-11	18.4793
RAPGEF1	0.456286	5.62477	7.33196	9.15173e-13	4.84207e-11	18.4691
RAB5C	0.245855	5.76653	7.33077	9.22517e-13	4.86614e-11	18.4614
ABL2	0.402727	3.14974	7.32899	9.33658e-13	4.91003e-11	18.4497
PRPF40A	0.313872	5.49974	7.32727	9.44553e-13	4.95236e-11	18.4385
CDK12	0.403173	4.36209	7.32579	9.53996e-13	4.98685e-11	18.4288
M6PR	0.394804	6.45453	7.3196	9.94641e-13	5.18375e-11	18.3884
SOWAHC	0.606777	5.39085	7.31743	1.00929e-12	5.24437e-11	18.3742
SSB	0.360461	5.79388	7.30963	1.0636e-12	5.51017e-11	18.3233
POGK	0.403667	5.21198	7.309	1.06815e-12	5.51728e-11	18.3192
MPZL1	0.370894	6.37479	7.30322	1.11047e-12	5.71894e-11	18.2815
ISCA1	0.419457	4.94471	7.30201	1.11955e-12	5.74865e-11	18.2736
TMED9	0.309177	7.55001	7.29714	1.15679e-12	5.92245e-11	18.2418
CHPF	0.579866	7.19518	7.29141	1.20217e-12	6.13236e-11	18.2045
OCRL	0.376328	4.82079	7.29108	1.20484e-12	6.13236e-11	18.2024
ZC3HAV1	0.332175	4.5607	7.28811	1.22906e-12	6.23178e-11	18.1831
CDC6	0.554804	4.69269	7.28781	1.23153e-12	6.23178e-11	18.1811
MED1	0.456131	4.27124	7.28734	1.23547e-12	6.23355e-11	18.178
FAM131A	0.548062	3.81488	7.28331	1.26932e-12	6.38584e-11	18.1518
SMC2	0.498292	4.55383	7.27873	1.30888e-12	6.56589e-11	18.122
GZF1	0.328716	3.81131	7.2768	1.32591e-12	6.63223e-11	18.1095
CPD	0.50013	5.46881	7.27472	1.34453e-12	6.7061e-11	18.096
LNPK	0.394759	4.3474	7.27295	1.3606e-12	6.76683e-11	18.0844
ANAPC1	0.36174	2.88867	7.2723	1.36652e-12	6.77694e-11	18.0802
CRTAP	0.387034	6.17972	7.27121	1.37646e-12	6.80683e-11	18.0732
CDK5RAP2	0.666103	4.56885	7.26952	1.39214e-12	6.86487e-11	18.0622
DNAJC3	0.35094	5.61354	7.26886	1.39835e-12	6.87601e-11	18.0579
OTULIN	0.410265	4.27885	7.2675	1.41111e-12	6.91919e-11	18.0491
CNOT11	0.326193	6.39485	7.26587	1.42662e-12	6.97562e-11	18.0385
CARNMT1	0.356908	3.98043	7.26386	1.44597e-12	7.03923e-11	18.0254
ZNF281	0.379073	4.31644	7.26368	1.44772e-12	7.03923e-11	18.0242
TPM3	0.277428	6.5034	7.26196	1.46444e-12	7.1007e-11	18.0131
RPS6KC1	0.401907	4.30325	7.25878	1.49588e-12	7.23298e-11	17.9925
AAK1	0.399957	3.1179	7.25618	1.52213e-12	7.33953e-11	17.9756
GOLGA4	0.392464	4.55074	7.25398	1.54472e-12	7.42786e-11	17.9614
EXOC6B	0.475513	4.15683	7.25078	1.57814e-12	7.56766e-11	17.9406
ALS2	0.37235	3.44624	7.24964	1.59021e-12	7.6046e-11	17.9332
SELENOI	0.533895	5.17308	7.24861	1.60118e-12	7.63608e-11	17.9265
NOL8	0.362356	3.9854	7.24722	1.61616e-12	7.68648e-11	17.9175
ZMYND19	0.440366	5.24532	7.24667	1.62203e-12	7.69336e-11	17.914
B4GALT3	0.336471	5.68854	7.24515	1.63856e-12	7.75065e-11	17.9042
GGCX	0.29687	4.50462	7.24437	1.6472e-12	7.77039e-11	17.8991
APLP2	0.440537	8.15539	7.24118	1.68264e-12	7.91614e-11	17.8784
ACTR2	0.323185	8.13997	7.23819	1.7165e-12	8.04416e-11	17.8591
SPATS2L	0.429533	4.58634	7.23797	1.71909e-12	8.04416e-11	17.8576
PGM3	0.337581	4.12525	7.23664	1.73438e-12	8.09391e-11	17.849
TBC1D20	0.333679	4.97194	7.23524	1.75072e-12	8.14832e-11	17.8399
PIP5K1A	0.363373	5.64832	7.23484	1.7554e-12	8.14833e-11	17.8374
SSH1	0.393713	4.11126	7.23111	1.79961e-12	8.33133e-11	17.8132
PPM1G	0.330235	7.26191	7.22834	1.83317e-12	8.46421e-11	17.7953
ABCF3	0.442457	6.16155	7.22512	1.87289e-12	8.62471e-11	17.7745
PVR	0.467723	4.50343	7.2234	1.89453e-12	8.70132e-11	17.7634
PANX1	0.425297	5.10472	7.21845	1.95806e-12	8.96946e-11	17.7314
MAFG	0.562218	4.99055	7.2168	1.97965e-12	9.04458e-11	17.7208
UBE3C	0.377149	5.51217	7.2143	2.01293e-12	9.15864e-11	17.7046
LRRC8A	0.603372	6.45522	7.21413	2.01514e-12	9.15864e-11	17.7035
UBE2G1	0.3424	5.53181	7.21246	2.03764e-12	9.22609e-11	17.6928
CHPF2	0.400212	5.90062	7.21225	2.04058e-12	9.22609e-11	17.6914
DHX57	0.3485	3.8708	7.21027	2.0676e-12	9.32401e-11	17.6786
PKM	0.409805	9.55064	7.2041	2.15416e-12	9.68926e-11	17.6388
DHX8	0.354801	4.6273	7.20084	2.20146e-12	9.87649e-11	17.6178
PSMD7	0.353031	5.63185	7.19999	2.21396e-12	9.90702e-11	17.6123
ATG101	0.349841	4.51637	7.19738	2.25265e-12	1.00543e-10	17.5955
MED27	0.36257	4.35426	7.19597	2.27376e-12	1.01226e-10	17.5865
COPB1	0.387892	6.62581	7.18782	2.40027e-12	1.06585e-10	17.534
SEC31A	0.31625	6.0535	7.1866	2.41975e-12	1.07176e-10	17.5261
RAB5A	0.266585	5.27119	7.18622	2.42587e-12	1.07176e-10	17.5237
USP28	0.435519	4.59259	7.18237	2.4887e-12	1.09673e-10	17.4989
ATP11B	0.627679	5.79994	7.18192	2.49612e-12	1.09722e-10	17.496
AP3B1	0.285992	5.03136	7.1813	2.50636e-12	1.09895e-10	17.492
UBE2Q1	0.298055	6.24858	7.1795	2.53648e-12	1.10936e-10	17.4804
PLEKHA8	0.334275	2.66997	7.17842	2.55473e-12	1.11454e-10	17.4735
DUSP12	0.336873	5.07233	7.17519	2.60999e-12	1.1358e-10	17.4527
YKT6	0.336368	5.98334	7.17424	2.62661e-12	1.14018e-10	17.4466
ITGA6	0.765942	7.1526	7.17368	2.63624e-12	1.14152e-10	17.443
SNX27	0.327656	3.54921	7.1713	2.67825e-12	1.15683e-10	17.4277
ANKRD40	0.385039	5.01789	7.16794	2.73849e-12	1.17992e-10	17.4061
DIPK1A	0.451952	4.3377	7.16658	2.76323e-12	1.18516e-10	17.3974
FAM169A	0.457804	1.45374	7.16653	2.76426e-12	1.18516e-10	17.3971
DYNC1LI1	0.267258	4.39998	7.16551	2.78291e-12	1.19022e-10	17.3905
TUT7	0.374492	4.05211	7.16389	2.81292e-12	1.20011e-10	17.3801
VEZT	0.293661	4.8088	7.15848	2.91555e-12	1.24005e-10	17.3454
ANLN	0.534613	5.29601	7.15821	2.92078e-12	1.24005e-10	17.3437
ATG9A	0.411147	4.46351	7.154	3.00321e-12	1.27194e-10	17.3167
C5orf51	0.404973	5.01783	7.15187	3.0459e-12	1.28689e-10	17.303
CDC73	0.30171	4.19948	7.14657	3.15444e-12	1.32953e-10	17.2691
CORO1C	0.416149	6.83986	7.14246	3.24119e-12	1.36279e-10	17.2428
IPO8	0.363078	4.99839	7.13968	3.30124e-12	1.38469e-10	17.225
QSOX1	0.431398	6.35218	7.13147	3.4851e-12	1.4583e-10	17.1724
ACACA	0.44003	4.66491	7.12747	3.5783e-12	1.4937e-10	17.1469
ELF4	0.423096	5.42299	7.12648	3.60184e-12	1.49993e-10	17.1405
SLC5A3	0.433899	3.61455	7.11901	3.78352e-12	1.57183e-10	17.0928
CRK	0.304095	5.94482	7.11499	3.88492e-12	1.61011e-10	17.0672
STIP1	0.346731	7.34528	7.10431	4.16786e-12	1.72328e-10	16.999
UCK1	0.335246	5.24623	7.10099	4.25998e-12	1.7558e-10	16.9778
TGOLN2	0.385994	6.79907	7.10075	4.2667e-12	1.7558e-10	16.9763
BAZ1B	0.396498	5.91851	7.09778	4.35074e-12	1.78278e-10	16.9574
ACSL3	0.373953	5.5588	7.09771	4.35274e-12	1.78278e-10	16.957
LIMS1	0.334581	5.23785	7.0962	4.39626e-12	1.79638e-10	16.9473
MAP3K20	0.417404	3.96601	7.09431	4.45114e-12	1.81454e-10	16.9353
ALDH18A1	0.320848	6.47289	7.09343	4.47707e-12	1.82085e-10	16.9297
SLC2A1	0.809018	8.63341	7.08775	4.64713e-12	1.88561e-10	16.8935
MRPS2	0.355454	5.10541	7.08199	4.82618e-12	1.9537e-10	16.8569
ZNF777	0.427554	4.76592	7.07761	4.96692e-12	2.00601e-10	16.829
STARD7	0.384844	7.47531	7.07354	5.10109e-12	2.05543e-10	16.8032
KIF14	0.509581	3.09453	7.07194	5.15505e-12	2.07238e-10	16.793
IRAK1	0.41377	7.3212	7.06921	5.24823e-12	2.1009e-10	16.7757
ECT2	0.586189	5.93658	7.06915	5.25014e-12	2.1009e-10	16.7753
TBK1	0.269791	2.96595	7.067	5.3245e-12	2.12374e-10	16.7617
GPI	0.533458	7.37311	7.0668	5.33162e-12	2.12374e-10	16.7604
NLN	0.394289	3.5739	7.06596	5.3609e-12	2.13053e-10	16.7551
MESD	0.290228	5.14045	7.0625	5.48392e-12	2.17446e-10	16.7331
LRRFIP2	0.281432	3.75362	7.06174	5.51135e-12	2.18036e-10	16.7283
MAP2K1	0.310005	6.08323	7.06132	5.52638e-12	2.18135e-10	16.7256
SUCO	0.407746	4.65428	7.06072	5.54825e-12	2.18503e-10	16.7218
FBXO11	0.376615	4.00917	7.05916	5.60516e-12	2.20145e-10	16.7119
HSP90AB1	0.369584	10.7489	7.05888	5.61524e-12	2.20145e-10	16.7102
PANK2	0.316219	3.92287	7.05806	5.64557e-12	2.20795e-10	16.7049
DAB2IP	0.571546	4.68841	7.05775	5.65719e-12	2.20795e-10	16.7029
PSMD12	0.311111	5.71796	7.0552	5.75214e-12	2.23999e-10	16.6868
SRBD1	0.322258	3.69056	7.05308	5.83246e-12	2.2662e-10	16.6734
BCORL1	0.429549	3.3434	7.04804	6.02803e-12	2.33697e-10	16.6414
C9orf64	0.399435	4.22125	7.04705	6.06721e-12	2.34693e-10	16.6351
TMEM268	0.357756	4.26255	7.04403	6.1882e-12	2.38843e-10	16.616
FAF2	0.295133	5.33814	7.04261	6.2457e-12	2.40529e-10	16.6071
ZBTB41	0.400345	3.80469	7.0412	6.30372e-12	2.42227e-10	16.5981
TUBB4B	0.437304	9.06363	7.0377	6.44919e-12	2.47271e-10	16.576
BAZ2A	0.385865	5.36144	7.03301	6.64987e-12	2.54405e-10	16.5463
FXR2	0.350749	4.85979	7.02993	6.78474e-12	2.58995e-10	16.5268
PRKCI	0.496034	5.97898	7.02688	6.92109e-12	2.63622e-10	16.5076
CTNNAL1	0.659666	5.16816	7.02555	6.98132e-12	2.65336e-10	16.4992
GRPEL1	0.321987	4.99053	7.0245	7.02934e-12	2.66464e-10	16.4925
SPINDOC	0.431824	5.52486	7.02423	7.04161e-12	2.66464e-10	16.4908
CRNKL1	0.331168	4.87501	7.02267	7.11376e-12	2.6861e-10	16.481
COPB2	0.344451	5.5608	7.02058	7.21152e-12	2.71712e-10	16.4677
RBAK	0.37204	3.69848	7.01972	7.25186e-12	2.72642e-10	16.4623
FEZ2	0.300262	4.0784	7.01688	7.38707e-12	2.77127e-10	16.4444
POFUT2	0.36764	3.91427	7.01636	7.41256e-12	2.77485e-10	16.4411
EIF2AK1	0.3021	7.00852	7.00887	7.7827e-12	2.90716e-10	16.3939
LMLN	0.425364	2.76259	7.00781	7.83659e-12	2.91504e-10	16.3872
UCHL5	0.320672	4.46623	7.0078	7.8373e-12	2.91504e-10	16.3871
SNX12	0.286987	6.54058	7.00736	7.85981e-12	2.91718e-10	16.3843
DDX52	0.342796	3.73068	7.0057	7.94483e-12	2.94246e-10	16.3739
GAPDH	0.47502	11.7479	6.99674	8.42149e-12	3.11238e-10	16.3175
USP10	0.344731	5.84027	6.99406	8.56943e-12	3.16034e-10	16.3006
SLC37A3	0.324479	3.81091	6.99137	8.72093e-12	3.20941e-10	16.2836
RO60	0.331974	3.85961	6.9895	8.82731e-12	3.24171e-10	16.2719
ZW10	0.366072	4.96684	6.9826	9.23158e-12	3.38303e-10	16.2285
CAMSAP1	0.417981	4.37431	6.97741	9.54813e-12	3.49169e-10	16.1959
SLC36A1	0.433871	3.61967	6.97347	9.79488e-12	3.57441e-10	16.1711
MAGEF1	0.618951	7.25044	6.9726	9.85043e-12	3.58072e-10	16.1657
NUP205	0.41309	5.56026	6.97255	9.85331e-12	3.58072e-10	16.1654
NDEL1	0.294366	4.30056	6.9721	9.88258e-12	3.58388e-10	16.1625
FRMD4B	0.405979	3.37852	6.97162	9.91301e-12	3.58744e-10	16.1595
KIF13A	0.475725	4.42846	6.97079	9.96677e-12	3.59941e-10	16.1543
EIF2S2	0.304174	7.35396	6.96729	1.01955e-11	3.67437e-10	16.1323
BET1L	0.272826	5.27884	6.96454	1.03784e-11	3.73256e-10	16.1151
HUS1	0.317073	4.03556	6.95833	1.08039e-11	3.8776e-10	16.0762
TMEM185B	0.362825	5.44603	6.95649	1.09333e-11	3.91596e-10	16.0647
GOSR2	0.257831	3.52905	6.9502	1.13873e-11	4.06373e-10	16.0253
KIFBP	0.301538	3.6572	6.95013	1.13925e-11	4.06373e-10	16.0248
TOR1AIP2	0.288534	3.88195	6.9496	1.14315e-11	4.06927e-10	16.0215
MAP4K4	0.418919	5.45883	6.94896	1.14792e-11	4.07794e-10	16.0175
CDR2	0.320218	4.45591	6.94634	1.16751e-11	4.1364e-10	16.0011
UBE2Z	0.288219	6.61085	6.94601	1.17005e-11	4.1364e-10	15.999
APP	0.46982	8.86671	6.94581	1.17151e-11	4.1364e-10	15.9978
MKLN1	0.306531	3.43611	6.9361	1.24737e-11	4.39535e-10	15.937
SCAMP3	0.296573	6.91692	6.93011	1.29651e-11	4.55926e-10	15.8996
UBAP2L	0.344334	6.53159	6.92841	1.31081e-11	4.60025e-10	15.889
INIP	0.31077	4.42241	6.92761	1.31763e-11	4.61487e-10	15.8839
KPNA2	0.447478	6.34161	6.92715	1.32148e-11	4.61908e-10	15.8811
TLK2	0.299087	3.90848	6.92673	1.3251e-11	4.62245e-10	15.8785
LMAN2L	0.351434	5.38571	6.92621	1.32955e-11	4.62868e-10	15.8752
ANKS6	0.39807	3.56752	6.92554	1.33533e-11	4.63953e-10	15.871
SLC35E1	0.331038	4.90286	6.92325	1.35514e-11	4.699e-10	15.8568
PPP1R26	0.579239	3.88301	6.92192	1.3668e-11	4.72141e-10	15.8485
SCARB2	0.360118	5.32134	6.92187	1.36726e-11	4.72141e-10	15.8481
FAM189B	0.395882	5.36282	6.92142	1.37122e-11	4.72141e-10	15.8453
SLC35F6	0.311051	5.77164	6.92128	1.37246e-11	4.72141e-10	15.8445
SMS	0.520582	7.56359	6.91211	1.45601e-11	4.99896e-10	15.7872
NDUFA8	0.35392	7.40697	6.91046	1.47152e-11	5.04227e-10	15.777
IGF1R	0.621897	4.99218	6.90737	1.50104e-11	5.13333e-10	15.7577
KTN1	0.397011	5.49878	6.90427	1.53133e-11	5.22663e-10	15.7384
OSBPL1A	0.454733	3.95048	6.90031	1.57082e-11	5.35095e-10	15.7137
ZNF275	0.412406	3.66335	6.89666	1.60809e-11	5.46719e-10	15.691
TRMT6	0.387538	5.06579	6.89587	1.61631e-11	5.48442e-10	15.6861
HNRNPU	0.305922	6.2411	6.88876	1.69182e-11	5.72946e-10	15.6419
MATN2	0.812595	4.28459	6.88702	1.71086e-11	5.7827e-10	15.6311
FAM20B	0.444661	5.78595	6.88475	1.7359e-11	5.8491e-10	15.617
PSMD4	0.304635	7.53736	6.88457	1.73799e-11	5.8491e-10	15.6158
PSMD14	0.334764	5.53537	6.88433	1.74058e-11	5.8491e-10	15.6144
KBTBD2	0.300711	5.34439	6.8834	1.751e-11	5.87277e-10	15.6086
ITGAV	0.495961	6.3805	6.88264	1.75956e-11	5.89013e-10	15.6039
RBM12	0.276963	5.41225	6.87728	1.8212e-11	6.08476e-10	15.5706
BPNT2	0.346548	5.76747	6.87533	1.84407e-11	6.14392e-10	15.5585
TP53BP1	0.401299	3.51017	6.87517	1.84596e-11	6.14392e-10	15.5575
TPBG	0.55361	5.85621	6.86953	1.91393e-11	6.3465e-10	15.5225
BRD3	0.442574	4.11861	6.86951	1.91412e-11	6.3465e-10	15.5224
HSPA4	0.305955	6.53319	6.86875	1.92347e-11	6.36536e-10	15.5177
FOXM1	0.59702	5.58454	6.8626	2.00071e-11	6.60841e-10	15.4796
GLB1	0.305085	5.49817	6.85559	2.09251e-11	6.89853e-10	15.4361
FAM168B	0.405053	6.36954	6.8547	2.10452e-11	6.92504e-10	15.4306
FAM114A1	0.38372	5.36908	6.85126	2.15132e-11	7.06568e-10	15.4093
SMARCD1	0.338422	5.8758	6.8499	2.17001e-11	7.11363e-10	15.4009
KDM3A	0.432774	4.68245	6.84115	2.29489e-11	7.50887e-10	15.3468
RFFL	0.410353	3.2695	6.83777	2.34491e-11	7.65814e-10	15.3259
MOB1A	0.290911	6.80174	6.83669	2.36116e-11	7.69677e-10	15.3192
CWC22	0.293821	4.92608	6.83268	2.4223e-11	7.88131e-10	15.2945
TAOK1	0.361566	4.14104	6.82885	2.4822e-11	8.06115e-10	15.2708
DERL2	0.254535	4.36164	6.82617	2.52504e-11	8.18497e-10	15.2543
TULP3	0.403787	5.12016	6.82354	2.56769e-11	8.30778e-10	15.238
TRA2B	0.34382	5.6304	6.81317	2.7429e-11	8.84671e-10	15.1742
IMPDH1	0.464311	6.27656	6.81309	2.74443e-11	8.84671e-10	15.1736
WIPF2	0.346079	4.90668	6.81229	2.75829e-11	8.87495e-10	15.1688
ZER1	0.335732	5.46279	6.81002	2.79859e-11	8.97511e-10	15.1547
RFWD3	0.39296	5.0026	6.80995	2.79973e-11	8.97511e-10	15.1543
STK38L	0.442374	4.96071	6.80907	2.81552e-11	9.00915e-10	15.1489
NUP155	0.435862	4.89895	6.80713	2.85043e-11	9.10411e-10	15.137
PAFAH1B2	0.306599	5.88683	6.805	2.88931e-11	9.21138e-10	15.1238
DAP3	0.304158	6.46724	6.80252	2.93526e-11	9.34079e-10	15.1086
TSKU	0.562971	6.51983	6.80127	2.95863e-11	9.39796e-10	15.1009
AHCTF1	0.369567	4.45381	6.79998	2.98296e-11	9.458e-10	15.093
SLC39A7	0.353279	7.69613	6.79129	3.15229e-11	9.9767e-10	15.0395
UBR3	0.330466	4.06605	6.78649	3.24988e-11	1.02588e-09	15.01
TM9SF1	0.251437	2.07274	6.78632	3.2532e-11	1.02588e-09	15.0091
ARF4	0.312244	7.88117	6.78588	3.26243e-11	1.02693e-09	15.0063
SFXN1	0.428395	4.97293	6.7827	3.32894e-11	1.04597e-09	14.9868
NEK4	0.311301	3.2166	6.78145	3.35538e-11	1.05238e-09	14.9791
TTC21B	0.335362	3.09327	6.78093	3.36648e-11	1.05396e-09	14.9759
HK1	0.451487	6.88472	6.77965	3.39394e-11	1.06065e-09	14.9681
RPAP3	0.311389	4.56904	6.77504	3.49455e-11	1.08836e-09	14.9398
ENTPD7	0.410188	3.76932	6.77501	3.49512e-11	1.08836e-09	14.9396
RCC1L	0.294039	5.66548	6.77466	3.50301e-11	1.08887e-09	14.9375
TMED4	0.289125	6.71076	6.77178	3.56744e-11	1.10692e-09	14.9198
TTL	0.315464	3.81143	6.77054	3.59547e-11	1.11364e-09	14.9123
GOLIM4	0.546317	6.45417	6.77009	3.6059e-11	1.11488e-09	14.9095
FKBP15	0.301038	4.05643	6.76878	3.63594e-11	1.12218e-09	14.9014
USP47	0.366727	3.65997	6.76829	3.64718e-11	1.12365e-09	14.8984
SUN1	0.370245	5.48503	6.76795	3.65493e-11	1.12405e-09	14.8964
LAMA1	0.942801	2.1907	6.766	3.70035e-11	1.13601e-09	14.8844
NUP98	0.334418	5.32127	6.76066	3.82754e-11	1.17299e-09	14.8517
KDELR2	0.319025	7.90144	6.75915	3.86442e-11	1.18221e-09	14.8425
ZNF79	0.316224	3.11913	6.75569	3.94982e-11	1.20622e-09	14.8213
UBXN4	0.310162	6.83787	6.75375	3.99844e-11	1.21893e-09	14.8095
CSNK1G1	0.353969	3.61537	6.74534	4.21679e-11	1.28325e-09	14.758
CHID1	0.300462	5.55922	6.74398	4.25301e-11	1.29201e-09	14.7498
UTP15	0.2741	3.27917	6.73854	4.40171e-11	1.33485e-09	14.7165
BLZF1	0.308085	4.61224	6.73682	4.44976e-11	1.34708e-09	14.706
ZBTB6	0.3615	3.68438	6.73471	4.5092e-11	1.3627e-09	14.6932
LDLR	0.591407	5.63173	6.73332	4.54906e-11	1.37236e-09	14.6847
TRMT1L	0.311021	4.09324	6.72693	4.73586e-11	1.42625e-09	14.6457
NBR1	0.330065	5.65497	6.72567	4.7737e-11	1.43516e-09	14.638
CCT5	0.422549	7.48627	6.71931	4.96877e-11	1.48955e-09	14.5993
CYREN	0.300547	3.62445	6.71922	4.97174e-11	1.48955e-09	14.5987
NRDC	0.273524	6.10934	6.7157	5.08298e-11	1.52027e-09	14.5773
CLASP1	0.441654	4.74128	6.71517	5.09995e-11	1.52273e-09	14.5741
NAB2	0.490683	5.93571	6.71463	5.11737e-11	1.52531e-09	14.5708
TXN	0.638403	9.73556	6.71433	5.12697e-11	1.52556e-09	14.569
ANO6	0.361145	5.02469	6.71173	5.21165e-11	1.54811e-09	14.5531
SPART	0.47107	4.4356	6.71121	5.22855e-11	1.55048e-09	14.55
ZFAND5	0.33487	6.20471	6.70899	5.30228e-11	1.56559e-09	14.5365
SMG8	0.362294	4.16611	6.70896	5.30318e-11	1.56559e-09	14.5363
TUBA1C	0.393447	6.90496	6.70886	5.30649e-11	1.56559e-09	14.5357
SMIM13	0.383459	4.12175	6.70716	5.3635e-11	1.57457e-09	14.5254
DUSP14	0.524082	5.63421	6.70716	5.36361e-11	1.57457e-09	14.5253
CENPN	0.407597	3.71217	6.70714	5.36404e-11	1.57457e-09	14.5253
ADAR	0.363271	7.12873	6.70367	5.48244e-11	1.60661e-09	14.5041
PSME4	0.332788	5.54021	6.70315	5.50032e-11	1.60914e-09	14.501
LIG3	0.410641	3.60658	6.70159	5.55471e-11	1.62157e-09	14.4915
STX6	0.328784	5.22493	6.70139	5.56143e-11	1.62157e-09	14.4903
UHMK1	0.337522	5.76604	6.69922	5.6379e-11	1.63402e-09	14.4771
SEPTIN10	0.419213	5.98926	6.69919	5.63892e-11	1.63402e-09	14.4769
PTPN11	0.364078	5.93861	6.69915	5.6403e-11	1.63402e-09	14.4767
PRRC2C	0.438049	5.93458	6.69907	5.64312e-11	1.63402e-09	14.4762
PHF2	0.405657	5.14132	6.69885	5.65107e-11	1.63402e-09	14.4748
ATP13A3	0.413947	5.518	6.69703	5.71602e-11	1.65006e-09	14.4638
RAD51D	0.351519	2.53728	6.69513	5.78464e-11	1.66707e-09	14.4522
RNF24	0.410927	4.19454	6.69487	5.79409e-11	1.66707e-09	14.4507
GXYLT1	0.369313	3.17481	6.69321	5.85458e-11	1.6817e-09	14.4406
STK35	0.411788	5.21901	6.69036	5.96022e-11	1.70922e-09	14.4233
POLR1B	0.34396	3.99759	6.68793	6.05191e-11	1.73266e-09	14.4086
ZNF639	0.481099	5.01554	6.68327	6.23145e-11	1.78113e-09	14.3803
FGD1	0.5541	3.14131	6.67625	6.51129e-11	1.85807e-09	14.3378
GARS1	0.343259	4.88588	6.67447	6.58452e-11	1.87589e-09	14.327
RTN4	0.294728	7.20703	6.67413	6.59832e-11	1.87675e-09	14.325
SMARCAL1	0.27096	4.17448	6.67152	6.70724e-11	1.90462e-09	14.3091
EEF1AKNMT	0.32538	5.40683	6.66937	6.79801e-11	1.92725e-09	14.2961
KIF4A	0.466822	4.62075	6.66909	6.80986e-11	1.92747e-09	14.2945
DCAF1	0.297939	4.19592	6.66817	6.8494e-11	1.93551e-09	14.2889
RNF4	0.294602	5.0212	6.66615	6.93634e-11	1.9569e-09	14.2767
SRP68	0.273679	5.8311	6.66428	7.01821e-11	1.9768e-09	14.2653
SHCBP1	0.387867	3.29606	6.66308	7.07073e-11	1.98837e-09	14.2581
NPLOC4	0.306677	5.95668	6.65915	7.24694e-11	2.03464e-09	14.2343
C5orf22	0.389831	5.14065	6.65884	7.26089e-11	2.03527e-09	14.2324
TOP2A	0.581099	6.52691	6.65652	7.36664e-11	2.06159e-09	14.2185
SLC27A4	0.409699	5.44092	6.65424	7.47238e-11	2.08783e-09	14.2047
USO1	0.31761	6.09722	6.65301	7.53007e-11	2.10058e-09	14.1972
RBM14	0.287116	4.93685	6.65044	7.65217e-11	2.13122e-09	14.1817
IPO9	0.344917	5.11961	6.6461	7.8622e-11	2.18622e-09	14.1555
SLC25A44	0.301545	4.47356	6.64421	7.95541e-11	2.20861e-09	14.1441
PPIB	0.307552	7.74284	6.64048	8.1428e-11	2.25703e-09	14.1216
STRAP	0.369287	8.02649	6.63935	8.20033e-11	2.26937e-09	14.1148
SLC25A25	0.520732	4.1279	6.63861	8.23794e-11	2.27616e-09	14.1104
SIN3A	0.350554	4.62292	6.63834	8.25226e-11	2.2765e-09	14.1087
GOLM1	0.528815	5.98149	6.63683	8.33001e-11	2.29084e-09	14.0996
NADK2	0.398912	4.28184	6.63682	8.33056e-11	2.29084e-09	14.0996
STX17	0.312026	3.61594	6.63466	8.44359e-11	2.31826e-09	14.0865
POLDIP2	0.332563	7.38313	6.6335	8.50482e-11	2.33139e-09	14.0795
PSAT1	0.71224	6.67523	6.63315	8.52354e-11	2.33285e-09	14.0774
WDR43	0.348278	5.98629	6.62856	8.77038e-11	2.39664e-09	14.0498
VPS8	0.429042	4.17037	6.62646	8.88604e-11	2.42444e-09	14.0372
ANKEF1	0.423744	3.42473	6.6254	8.94488e-11	2.43667e-09	14.0308
CDYL	0.337019	5.00541	6.62395	9.02577e-11	2.45487e-09	14.0221
FAM219A	0.443657	4.67725	6.62211	9.12967e-11	2.47925e-09	14.011
VKORC1L1	0.327938	5.30318	6.62122	9.1806e-11	2.48561e-09	14.0056
ESCO1	0.344997	4.28575	6.62112	9.18658e-11	2.48561e-09	14.005
CHST14	0.430771	5.86331	6.62095	9.19592e-11	2.48561e-09	14.004
WWTR1	0.490465	5.22854	6.62054	9.21949e-11	2.48812e-09	14.0015
HASPIN	0.42668	2.68802	6.61874	9.32335e-11	2.51225e-09	13.9907
IPO7	0.343838	6.35262	6.61756	9.39217e-11	2.52689e-09	13.9836
KIF23	0.442585	4.36517	6.61724	9.41064e-11	2.52795e-09	13.9817
LMBR1	0.346678	4.02192	6.61624	9.46915e-11	2.53786e-09	13.9757
EXOSC2	0.35817	4.779	6.61612	9.47671e-11	2.53786e-09	13.9749
DHX33	0.405901	4.26667	6.61511	9.53643e-11	2.54993e-09	13.9689
EIF2AK4	0.329751	4.30834	6.61426	9.58675e-11	2.55946e-09	13.9638
RNF6	0.323734	5.02279	6.61135	9.76194e-11	2.60224e-09	13.9463
PRNP	0.560578	8.08994	6.6096	9.86839e-11	2.62659e-09	13.9358
FAM102A	0.486129	5.92423	6.60549	1.01239e-10	2.69049e-09	13.9111
DGKG	0.667341	1.79104	6.60402	1.02167e-10	2.71101e-09	13.9023
ZFR	0.316959	5.90837	6.60341	1.02552e-10	2.71709e-09	13.8986
DNAJC21	0.36067	4.90956	6.5981	1.05991e-10	2.80392e-09	13.8667
BNIP3	0.591457	5.48021	6.5974	1.06448e-10	2.81175e-09	13.8626
UEVLD	0.290249	3.93499	6.59601	1.07373e-10	2.83189e-09	13.8542
STRBP	0.504742	4.20284	6.59425	1.08549e-10	2.85856e-09	13.8437
SHMT2	0.386141	6.84447	6.59366	1.08946e-10	2.8642e-09	13.8402
CNOT4	0.284698	3.72595	6.59345	1.09092e-10	2.8642e-09	13.8389
HSPA9	0.305592	6.43271	6.59034	1.11214e-10	2.91551e-09	13.8202
CARS1	0.277712	4.15768	6.58971	1.11651e-10	2.92258e-09	13.8165
TLCD3A	0.480924	5.82652	6.5877	1.13045e-10	2.95462e-09	13.8045
FKBP4	0.456263	6.79076	6.58736	1.13288e-10	2.95652e-09	13.8024
XPO5	0.381808	4.9713	6.58619	1.14108e-10	2.97348e-09	13.7954
PSMC3IP	0.411652	2.84956	6.58449	1.15317e-10	3.00049e-09	13.7852
KIAA1549	0.693203	2.68077	6.58314	1.1629e-10	3.02127e-09	13.7771
ZNF343	0.376747	3.23911	6.58149	1.17482e-10	3.0477e-09	13.7673
RPA1	0.391418	6.28964	6.58103	1.17814e-10	3.05178e-09	13.7645
DESI2	0.32744	5.84367	6.58078	1.18003e-10	3.05211e-09	13.763
CENPO	0.362396	3.23892	6.58031	1.18343e-10	3.05638e-09	13.7602
TNFAIP1	0.347802	6.21086	6.57855	1.19636e-10	3.0852e-09	13.7497
PRRC1	0.240219	4.64296	6.57775	1.20237e-10	3.09609e-09	13.7449
RNF187	0.318407	7.48312	6.57477	1.22473e-10	3.14902e-09	13.727
KDM5A	0.360074	4.55503	6.571	1.25365e-10	3.21862e-09	13.7045
NLGN2	0.475183	4.35889	6.56806	1.27662e-10	3.27278e-09	13.6869
WASF1	0.718018	4.63072	6.56492	1.30161e-10	3.33194e-09	13.6682
TXNDC12	0.273653	2.95209	6.56443	1.30554e-10	3.33707e-09	13.6653
COASY	0.312194	6.25141	6.56409	1.30835e-10	3.33936e-09	13.6632
SLC49A4	0.413828	4.91459	6.56157	1.32888e-10	3.3868e-09	13.6482
TMEM115	0.249348	5.5692	6.56086	1.33465e-10	3.39652e-09	13.644
C2orf42	0.264662	3.50401	6.55968	1.34447e-10	3.41653e-09	13.6369
TES	0.362648	6.18234	6.55286	1.40227e-10	3.55821e-09	13.5962
MTHFD2	0.47715	4.82	6.55198	1.40991e-10	3.57238e-09	13.591
GPR161	0.53341	3.21639	6.54998	1.4274e-10	3.61144e-09	13.5791
APH1A	0.284236	7.90133	6.54866	1.4391e-10	3.63576e-09	13.5712
NCL	0.342717	8.04735	6.54745	1.44983e-10	3.65755e-09	13.564
TUBB6	0.564502	6.37493	6.54638	1.45946e-10	3.67653e-09	13.5576
ATP1B1	0.619491	8.1059	6.5448	1.47369e-10	3.70329e-09	13.5482
TAF5L	0.290522	4.34071	6.54473	1.47434e-10	3.70329e-09	13.5478
B3GALNT2	0.303736	3.43743	6.54332	1.48727e-10	3.73038e-09	13.5393
DCTN1	0.35072	5.40449	6.53918	1.52567e-10	3.82119e-09	13.5147
BIRC6	0.342478	4.23343	6.5368	1.5482e-10	3.87207e-09	13.5005
MELTF	0.777101	4.13594	6.53489	1.56651e-10	3.91223e-09	13.4892
DDRGK1	0.342817	6.57013	6.53347	1.58026e-10	3.93798e-09	13.4807
ZNF189	0.363153	4.30882	6.53336	1.58135e-10	3.93798e-09	13.4801
AGPS	0.356348	4.55137	6.53288	1.58605e-10	3.94405e-09	13.4772
CLIP2	0.553036	3.85905	6.52979	1.6165e-10	4.01403e-09	13.4588
EDEM3	0.311413	4.65181	6.52943	1.62004e-10	4.01711e-09	13.4567
PTDSS1	0.492786	6.6565	6.52811	1.63323e-10	4.04405e-09	13.4489
GPATCH4	0.360798	4.85006	6.52759	1.63851e-10	4.05136e-09	13.4458
BUB1	0.435232	4.40856	6.52711	1.64332e-10	4.05749e-09	13.4429
PSMD5	0.370332	5.15981	6.52531	1.66159e-10	4.09679e-09	13.4323
AIDA	0.291107	4.37662	6.52316	1.68374e-10	4.14552e-09	13.4195
PSMF1	0.282273	5.63083	6.52205	1.69529e-10	4.16806e-09	13.4129
UBC	0.262501	9.20386	6.52078	1.7086e-10	4.19486e-09	13.4053
KLHL12	0.320592	5.79568	6.51916	1.72567e-10	4.2308e-09	13.3957
NF1	0.419329	3.56727	6.51598	1.75968e-10	4.30373e-09	13.3768
SQSTM1	0.464788	6.49286	6.51582	1.76147e-10	4.30373e-09	13.3759
CLCN2	0.511004	2.56782	6.51569	1.76283e-10	4.30373e-09	13.3751
SDK1	0.732803	4.13221	6.51413	1.77981e-10	4.33909e-09	13.3659
TTC26	0.340026	3.09277	6.51297	1.79252e-10	4.36396e-09	13.359
ABCF1	0.347773	6.42742	6.5122	1.801e-10	4.37849e-09	13.3544
ZNF622	0.339447	6.30404	6.51093	1.81514e-10	4.40672e-09	13.3469
TPX2	0.509574	6.74731	6.51053	1.81961e-10	4.41141e-09	13.3445
PIP4K2B	0.35149	5.32889	6.50609	1.86982e-10	4.52684e-09	13.3182
SOCS5	0.300402	3.81655	6.50226	1.91432e-10	4.62542e-09	13.2955
POLR2A	0.428231	6.83236	6.50213	1.91585e-10	4.62542e-09	13.2947
LAMA3	0.860157	4.94103	6.50162	1.92177e-10	4.63328e-09	13.2917
RTKN	0.42631	5.10446	6.49864	1.95722e-10	4.71222e-09	13.2741
SPIRE1	0.492958	3.43108	6.49737	1.97252e-10	4.7375e-09	13.2665
MRPL17	0.318482	6.07475	6.49732	1.97316e-10	4.7375e-09	13.2662
RETREG3	0.262911	5.93334	6.49392	2.01465e-10	4.83045e-09	13.2461
SPAG9	0.324423	4.85019	6.48917	2.07416e-10	4.96508e-09	13.218
DENND5A	0.36739	4.67017	6.48898	2.07651e-10	4.96508e-09	13.2169
TYW1	0.305879	4.21365	6.48766	2.09336e-10	4.9985e-09	13.2091
PPP4R3B	0.292219	5.67251	6.48729	2.09814e-10	5.00306e-09	13.2069
SLC41A1	0.374728	4.76473	6.48602	2.11457e-10	5.03534e-09	13.1994
NACC2	0.403028	3.56519	6.48548	2.12153e-10	5.04502e-09	13.1962
UTP6	0.3024	4.82874	6.48182	2.16959e-10	5.15225e-09	13.1745
ADIPOR1	0.267952	7.60332	6.4814	2.17517e-10	5.15847e-09	13.1721
PHF19	0.344809	4.06193	6.48103	2.18008e-10	5.16308e-09	13.1699
PHKA1	0.433657	3.52122	6.48054	2.18669e-10	5.17171e-09	13.167
XRN2	0.318173	6.87883	6.47709	2.23325e-10	5.27465e-09	13.1466
USP32	0.305973	4.16424	6.47687	2.23629e-10	5.27468e-09	13.1453
HSPA6	0.70865	3.86547	6.47628	2.24428e-10	5.28636e-09	13.1419
PTHLH	1.31965	5.69736	6.47475	2.26543e-10	5.32741e-09	13.1328
ZBTB2	0.253868	4.60543	6.47458	2.26783e-10	5.32741e-09	13.1318
SLC31A1	0.345427	5.37574	6.47203	2.30343e-10	5.39682e-09	13.1167
TNPO3	0.347362	5.85054	6.47202	2.30358e-10	5.39682e-09	13.1167
SEC61A1	0.281344	8.44809	6.47054	2.32449e-10	5.43849e-09	13.1079
UTP25	0.324691	3.6576	6.46884	2.34874e-10	5.48786e-09	13.0979
CCT3	0.312421	8.25154	6.46834	2.35591e-10	5.49722e-09	13.095
IGSF8	0.391972	6.33341	6.46723	2.37197e-10	5.5273e-09	13.0884
AP3D1	0.359366	6.11917	6.46698	2.37554e-10	5.52821e-09	13.087
CDC42SE1	0.302128	7.08506	6.46673	2.37911e-10	5.52914e-09	13.0855
MANBA	0.352732	3.74509	6.46572	2.39382e-10	5.5559e-09	13.0796
SLC12A7	0.612563	5.66012	6.46358	2.42542e-10	5.62174e-09	13.0669
CERS6	0.497268	4.38323	6.4633	2.42945e-10	5.62359e-09	13.0653
LMNB2	0.483356	6.61471	6.46181	2.45172e-10	5.66762e-09	13.0565
ZDHHC9	0.396593	5.65832	6.45987	2.48095e-10	5.72756e-09	13.045
NXPE3	0.518552	3.55099	6.45965	2.48428e-10	5.72766e-09	13.0437
FANCC	0.351549	2.51421	6.45849	2.50189e-10	5.76064e-09	13.0369
SRPK2	0.337562	4.98853	6.4576	2.51551e-10	5.78435e-09	13.0317
JAG1	0.703189	6.58209	6.45608	2.53887e-10	5.83036e-09	13.0227
RUNDC1	0.312173	4.16067	6.45534	2.55044e-10	5.84684e-09	13.0183
ZNF12	0.299549	4.49586	6.45519	2.55276e-10	5.84684e-09	13.0175
KCTD11	0.514777	4.81542	6.45329	2.58251e-10	5.90719e-09	13.0063
SLC35F5	0.35508	4.54555	6.45133	2.61343e-10	5.97008e-09	12.9948
ERLIN1	0.328478	5.92119	6.44674	2.68755e-10	6.13135e-09	12.9678
TPST1	0.448153	5.22226	6.44592	2.70104e-10	6.15405e-09	12.9629
OGFOD1	0.266252	4.43236	6.44424	2.72882e-10	6.20923e-09	12.9531
MRPL9	0.292778	5.64734	6.44268	2.7548e-10	6.26016e-09	12.9439
IPPK	0.385929	2.52833	6.43961	2.80677e-10	6.36994e-09	12.9259
EFL1	0.34877	4.11899	6.43889	2.81905e-10	6.38949e-09	12.9216
ACTRT3	0.449134	2.85214	6.43569	2.87451e-10	6.50671e-09	12.9028
CEP55	0.477274	5.42198	6.43546	2.8785e-10	6.50728e-09	12.9015
GEMIN4	0.368578	4.59494	6.43351	2.91295e-10	6.57662e-09	12.89
POM121	0.416337	4.03724	6.4318	2.94338e-10	6.63238e-09	12.88
SLFN5	0.465645	4.68845	6.43169	2.94527e-10	6.63238e-09	12.8793
FAM126A	0.397911	3.2981	6.43018	2.9724e-10	6.68482e-09	12.8705
TMEM39A	0.322921	4.98598	6.42939	2.98674e-10	6.70841e-09	12.8658
TPI1	0.375149	10.0709	6.42572	3.05413e-10	6.85093e-09	12.8443
ITGA2	0.653486	5.5922	6.42258	3.11289e-10	6.97375e-09	12.8259
FBXO45	0.443709	5.09663	6.42094	3.14406e-10	7.03452e-09	12.8163
IKBIP	0.361418	4.20688	6.42066	3.14943e-10	7.03602e-09	12.8146
ELOVL5	0.357571	6.76605	6.42048	3.15281e-10	7.03602e-09	12.8136
VWDE	0.66067	1.62891	6.41716	3.217e-10	7.17007e-09	12.7941
YIPF5	0.268535	5.54969	6.41507	3.25814e-10	7.25248e-09	12.7819
HIP1	0.430888	4.34555	6.4087	3.38639e-10	7.50761e-09	12.7446
IWS1	0.281253	5.48247	6.40862	3.38812e-10	7.50761e-09	12.7441
DENR	0.28171	6.50931	6.40847	3.3912e-10	7.50761e-09	12.7432
OTUD7B	0.373392	3.55215	6.40836	3.39343e-10	7.50761e-09	12.7426
MRPS9	0.29287	4.59809	6.40831	3.39432e-10	7.50761e-09	12.7423
GGNBP2	0.26323	4.61588	6.40648	3.43237e-10	7.58067e-09	12.7316
DYNLL2	0.399622	6.02729	6.4063	3.43606e-10	7.58067e-09	12.7305
ESYT2	0.332609	5.9387	6.4051	3.461e-10	7.62604e-09	12.7235
MRRF	0.309386	3.38852	6.40339	3.49721e-10	7.69607e-09	12.7135
CDC14B	0.369787	2.9134	6.40168	3.53347e-10	7.76207e-09	12.7035
PTGES2	0.317952	4.88427	6.40154	3.53655e-10	7.76207e-09	12.7027
AIFM2	0.443966	3.84551	6.40135	3.54058e-10	7.76207e-09	12.7016
ZDHHC12	0.36008	5.84052	6.39992	3.57144e-10	7.81568e-09	12.6932
FEM1C	0.300434	4.07652	6.3998	3.57401e-10	7.81568e-09	12.6925
DYNC1I2	0.257775	5.50337	6.39767	3.62041e-10	7.90722e-09	12.6801
NSRP1	0.314424	4.49084	6.39621	3.65259e-10	7.9675e-09	12.6715
FLII	0.352087	6.33027	6.39584	3.6608e-10	7.97541e-09	12.6694
SF3B4	0.319703	7.874	6.39538	3.67084e-10	7.98728e-09	12.6667
ASXL2	0.321885	3.93145	6.3948	3.68375e-10	8.00538e-09	12.6633
KIDINS220	0.373219	4.42419	6.39441	3.69257e-10	8.01453e-09	12.661
SS18	0.356616	5.52015	6.39002	3.79198e-10	8.22004e-09	12.6354
AZI2	0.243527	2.92387	6.38873	3.82158e-10	8.27391e-09	12.6279
PITPNA	0.279004	5.9224	6.38748	3.85058e-10	8.32633e-09	12.6206
GEMIN5	0.285769	3.98584	6.38495	3.90985e-10	8.44401e-09	12.6058
FAM98A	0.257403	5.05177	6.38458	3.91872e-10	8.45269e-09	12.6036
MFAP1	0.301754	5.8786	6.38398	3.93291e-10	8.46762e-09	12.6002
CDS2	0.283676	4.35798	6.38387	3.93537e-10	8.46762e-09	12.5995
GNA13	0.382077	5.98819	6.37994	4.02996e-10	8.66043e-09	12.5766
PRPF8	0.395925	6.46141	6.37796	4.07855e-10	8.75404e-09	12.5651
RIT1	0.545269	5.77781	6.37732	4.09424e-10	8.77691e-09	12.5613
TFG	0.326024	5.56023	6.37666	4.11057e-10	8.79385e-09	12.5575
CLPTM1L	0.371168	6.77324	6.3766	4.11225e-10	8.79385e-09	12.5571
SENP5	0.375084	5.15553	6.37435	4.16833e-10	8.90283e-09	12.544
PELP1	0.375927	5.29687	6.3731	4.19984e-10	8.95914e-09	12.5368
CCNT1	0.317042	4.51806	6.37189	4.23073e-10	9.01399e-09	12.5297
ST13	0.324761	7.86496	6.37111	4.25065e-10	9.04537e-09	12.5252
IKBKG	0.329054	3.07277	6.37062	4.26334e-10	9.06129e-09	12.5223
TMEM248	0.260376	6.58781	6.36967	4.28769e-10	9.10194e-09	12.5168
SP3	0.27641	4.51928	6.36885	4.30905e-10	9.13614e-09	12.512
STAU1	0.292105	7.13853	6.368	4.33106e-10	9.17162e-09	12.5071
CEP350	0.324938	3.8044	6.36775	4.3376e-10	9.17431e-09	12.5056
NFYA	0.318846	5.07072	6.36669	4.36548e-10	9.22207e-09	12.4994
RNF8	0.286535	3.7842	6.36355	4.44881e-10	9.38671e-09	12.4812
GTF3C3	0.321119	4.57622	6.36225	4.48395e-10	9.44941e-09	12.4736
IMMT	0.288351	6.65648	6.36085	4.52191e-10	9.51788e-09	12.4654
LPP	0.356105	4.13911	6.35996	4.54631e-10	9.54729e-09	12.4603
PGK1	0.415764	9.0622	6.35994	4.54685e-10	9.54729e-09	12.4601
PHF3	0.346182	3.70023	6.35556	4.66818e-10	9.79025e-09	12.4347
WDR26	0.268406	5.45187	6.35489	4.68727e-10	9.81844e-09	12.4308
XPO1	0.328678	5.00771	6.35458	4.69582e-10	9.82453e-09	12.429
RGP1	0.443376	3.86296	6.35406	4.71049e-10	9.83906e-09	12.426
OPA1	0.390904	5.52894	6.35394	4.71407e-10	9.83906e-09	12.4253
GALNT1	0.426582	6.54564	6.35267	4.75033e-10	9.90288e-09	12.4179
FERMT1	0.684593	5.62113	6.35126	4.7906e-10	9.97488e-09	12.4097
ZNF510	0.308518	2.69389	6.35057	4.81065e-10	1.00047e-08	12.4057
ACTG1	0.296493	12.0451	6.34994	4.82901e-10	1.00309e-08	12.402
MARVELD2	0.345888	3.78454	6.34798	4.88601e-10	1.01372e-08	12.3907
GRSF1	0.292363	5.54303	6.34367	5.01439e-10	1.0389e-08	12.3657
LARS2	0.265259	2.82362	6.34332	5.02493e-10	1.0389e-08	12.3636
ZDBF2	0.523394	2.08148	6.34316	5.02982e-10	1.0389e-08	12.3627
TANC1	0.352461	3.902	6.34311	5.03127e-10	1.0389e-08	12.3624
C11orf24	0.305438	5.54383	6.33804	5.18691e-10	1.06977e-08	12.333
POMT1	0.315115	3.3257	6.33687	5.22369e-10	1.07608e-08	12.3262
CCDC43	0.29324	4.39417	6.33542	5.26931e-10	1.08355e-08	12.3178
CKAP5	0.400163	5.81252	6.33522	5.27556e-10	1.08355e-08	12.3167
MORC2	0.348742	4.47164	6.33512	5.27862e-10	1.08355e-08	12.3161
TEX261	0.294205	6.25523	6.33076	5.41883e-10	1.11102e-08	12.2908
NPEPPS	0.279789	4.5048	6.32728	5.53299e-10	1.13309e-08	12.2707
SMC4	0.480527	5.12368	6.3263	5.56568e-10	1.13845e-08	12.265
CYFIP1	0.315727	5.78282	6.32593	5.5782e-10	1.1396e-08	12.2628
DDX21	0.371215	6.69367	6.32574	5.58441e-10	1.1396e-08	12.2618
HDGF	0.309702	8.6957	6.32466	5.62059e-10	1.14564e-08	12.2555
CEMIP2	0.45066	4.54659	6.32436	5.63102e-10	1.14597e-08	12.2538
TCAF1	0.372418	3.1891	6.32423	5.63538e-10	1.14597e-08	12.253
MIEF1	0.324789	4.82868	6.32402	5.64247e-10	1.14607e-08	12.2518
ERCC3	0.264124	4.70452	6.31858	5.82945e-10	1.18267e-08	12.2203
CDK13	0.260331	3.27018	6.31822	5.84185e-10	1.18381e-08	12.2183
ADO	0.304607	4.66959	6.31602	5.91956e-10	1.19816e-08	12.2055
ALG10	0.321781	2.43044	6.31505	5.95404e-10	1.20374e-08	12.1999
LHX5	0.637365	1.39807	6.31274	6.03692e-10	1.21908e-08	12.1866
SLC39A6	0.409049	6.64968	6.3093	6.16259e-10	1.24302e-08	12.1667
SEPTIN11	0.379534	5.23063	6.30588	6.29002e-10	1.26725e-08	12.147
SLC35B1	0.252841	5.18783	6.30568	6.2976e-10	1.26731e-08	12.1458
YWHAE	0.325312	8.903	6.3021	6.43369e-10	1.2932e-08	12.1252
ARHGAP11A	0.422519	3.72686	6.30191	6.44111e-10	1.2932e-08	12.1241
TTLL11	0.280354	1.8057	6.30108	6.47311e-10	1.29813e-08	12.1193
SUPT16H	0.372156	6.17093	6.30062	6.49079e-10	1.30017e-08	12.1167
KLHL11	0.359872	1.84804	6.30034	6.50194e-10	1.30091e-08	12.115
EEF1AKMT4	0.563825	5.37031	6.29922	6.54537e-10	1.3081e-08	12.1086
STAMBP	0.280569	4.79169	6.29842	6.577e-10	1.31291e-08	12.1039
EHMT1	0.342258	3.36729	6.29815	6.58747e-10	1.3135e-08	12.1024
DNAJC7	0.263647	3.9716	6.29243	6.81646e-10	1.3576e-08	12.0694
WDR75	0.303992	5.31371	6.29204	6.8323e-10	1.35799e-08	12.0672
MIB1	0.394755	4.68567	6.292	6.83402e-10	1.35799e-08	12.0669
CCT4	0.386116	7.86457	6.29088	6.87995e-10	1.36556e-08	12.0605
VANGL1	0.349043	4.04172	6.28856	6.97576e-10	1.383e-08	12.0471
IMPACT	0.402386	5.10417	6.28825	6.98865e-10	1.38398e-08	12.0454
NEDD4	0.369139	2.97114	6.28634	7.06879e-10	1.39825e-08	12.0344
YIPF4	0.258813	4.27249	6.28572	7.09534e-10	1.40191e-08	12.0307
HLCS	0.324093	3.24216	6.28475	7.13648e-10	1.40844e-08	12.0252
VRK2	0.389544	4.43137	6.28282	7.21884e-10	1.4215e-08	12.0141
NIBAN2	0.426036	7.81329	6.28282	7.21899e-10	1.4215e-08	12.0141
ROCK1	0.330286	4.21122	6.28072	7.30977e-10	1.43775e-08	12.002
MTHFD1L	0.382416	4.94606	6.28004	7.33981e-10	1.44203e-08	11.9981
PRCC	0.273	6.09912	6.27904	7.38334e-10	1.44895e-08	11.9924
SPTY2D1	0.301644	4.29981	6.27778	7.43915e-10	1.45826e-08	11.9851
PTPN9	0.298954	4.33402	6.27756	7.44888e-10	1.45852e-08	11.9838
CTDNEP1	0.241564	5.54924	6.27693	7.47713e-10	1.46241e-08	11.9802
SLC35B4	0.301312	3.53342	6.27605	7.51632e-10	1.46842e-08	11.9751
RRM1	0.427193	6.24623	6.27486	7.56988e-10	1.47723e-08	11.9683
CORO2A	0.49718	5.2932	6.27409	7.60454e-10	1.48185e-08	11.9639
FLOT2	0.356081	7.36546	6.27396	7.61056e-10	1.48185e-08	11.9631
ZXDB	0.309032	3.12445	6.273	7.65429e-10	1.4887e-08	11.9576
BECN1	0.289422	4.63828	6.27279	7.66395e-10	1.48891e-08	11.9564
ABCC1	0.73697	6.55555	6.27089	7.75091e-10	1.50413e-08	11.9455
FZD7	0.778502	5.37309	6.26994	7.7948e-10	1.51096e-08	11.94
HK2	0.636336	6.55667	6.26948	7.81629e-10	1.51344e-08	11.9374
EIF3J	0.287176	6.38737	6.26904	7.83695e-10	1.51575e-08	11.9348
NUP153	0.364546	5.55436	6.26844	7.86475e-10	1.51944e-08	11.9314
MED13	0.342329	4.58775	6.26638	7.96203e-10	1.53653e-08	11.9196
WDR44	0.309174	4.12062	6.26424	8.06394e-10	1.55447e-08	11.9073
TMEM184B	0.35424	5.89905	6.26273	8.13693e-10	1.56681e-08	11.8986
ITGA5	0.551965	5.79561	6.26242	8.15183e-10	1.56794e-08	11.8968
EPB41L4B	0.480353	3.39826	6.26223	8.16097e-10	1.56797e-08	11.8958
NCAPD2	0.462362	6.54282	6.26155	8.19433e-10	1.57264e-08	11.8918
ERO1A	0.521965	6.34114	6.26099	8.22136e-10	1.57609e-08	11.8887
TUBG1	0.33821	6.07779	6.25963	8.28807e-10	1.58713e-08	11.8809
ACTL6A	0.477855	6.61525	6.2593	8.30433e-10	1.5885e-08	11.879
VAV2	0.571439	4.65859	6.25737	8.40051e-10	1.60513e-08	11.8679
MTMR2	0.304079	3.79709	6.25402	8.56955e-10	1.63564e-08	11.8486
ARHGEF11	0.361051	4.76223	6.25374	8.58357e-10	1.63652e-08	11.8471
SLC10A3	0.299339	6.19274	6.2535	8.59561e-10	1.63702e-08	11.8457
PANX2	0.912235	4.18512	6.25232	8.65651e-10	1.64682e-08	11.8389
MAP2K4	0.295219	4.3167	6.25201	8.67235e-10	1.64803e-08	11.8371
NUP58	0.291804	4.26161	6.24984	8.78474e-10	1.66757e-08	11.8247
NSUN2	0.383477	6.08836	6.24922	8.81694e-10	1.67186e-08	11.8212
KCMF1	0.266561	5.4361	6.24897	8.83017e-10	1.67254e-08	11.8198
SAMD4B	0.412962	6.03179	6.24819	8.87141e-10	1.67853e-08	11.8153
OSGIN2	0.374752	4.44024	6.24718	8.92455e-10	1.68675e-08	11.8095
TUFT1	0.601392	5.82161	6.24576	9.00047e-10	1.69925e-08	11.8013
BCL2L13	0.365309	5.13956	6.24345	9.12438e-10	1.72056e-08	11.7881
LMAN1	0.354405	6.64476	6.24316	9.13996e-10	1.72056e-08	11.7865
POLR2D	0.309428	4.85808	6.24311	9.14299e-10	1.72056e-08	11.7862
DNAJC14	0.34001	3.83409	6.24279	9.16011e-10	1.72192e-08	11.7844
MAVS	0.37847	5.04934	6.24237	9.18295e-10	1.72435e-08	11.782
HAT1	0.281753	4.97172	6.24184	9.21203e-10	1.72795e-08	11.7789
MET	0.557537	5.66145	6.2413	9.2414e-10	1.73159e-08	11.7759
DKK1	0.968874	3.45941	6.23708	9.47558e-10	1.77356e-08	11.7517
PLD1	0.566636	3.95446	6.23479	9.60563e-10	1.79535e-08	11.7386
SOCS7	0.45506	3.63548	6.23466	9.61259e-10	1.79535e-08	11.7379
ERAL1	0.322069	6.37703	6.23233	9.74621e-10	1.81835e-08	11.7246
FREM2	0.91734	2.02975	6.23041	9.85811e-10	1.83726e-08	11.7136
ZC3HAV1L	0.530436	3.89236	6.22934	9.92048e-10	1.84691e-08	11.7075
KPNA4	0.319991	5.41295	6.22848	9.97157e-10	1.85444e-08	11.7025
PTBP1	0.270581	7.18341	6.22764	1.00213e-09	1.86169e-08	11.6977
SUPT6H	0.355568	5.51596	6.22734	1.0039e-09	1.86299e-08	11.696
PTGR1	0.962202	5.91478	6.22503	1.01774e-09	1.88667e-08	11.6828
GABARAPL1	0.4246	5.95126	6.21984	1.04949e-09	1.94345e-08	11.6532
TGFBR1	0.380662	4.88469	6.21896	1.05497e-09	1.95152e-08	11.6482
TMEM41B	0.297151	5.09912	6.21877	1.05613e-09	1.9516e-08	11.6471
TRUB2	0.290301	4.3854	6.21635	1.07133e-09	1.9776e-08	11.6333
BAG2	0.53946	3.15048	6.21617	1.07248e-09	1.97762e-08	11.6323
SPAST	0.409074	4.25147	6.21587	1.07439e-09	1.97903e-08	11.6306
EAF1	0.235308	3.79211	6.2154	1.0774e-09	1.98249e-08	11.6279
RRBP1	0.406985	6.938	6.21472	1.08171e-09	1.98832e-08	11.624
SAP130	0.313849	5.03315	6.21179	1.10065e-09	2.021e-08	11.6073
MIS12	0.324734	4.52116	6.2113	1.10385e-09	2.02473e-08	11.6045
ATP1A1	0.450912	6.81552	6.21	1.1123e-09	2.03809e-08	11.5971
YARS1	0.266143	5.39809	6.20564	1.14138e-09	2.08918e-08	11.5723
DPY19L1	0.470465	4.6405	6.20436	1.15002e-09	2.10278e-08	11.565
CANT1	0.29733	6.07712	6.20232	1.16397e-09	2.12422e-08	11.5534
CEBPG	0.425657	6.09434	6.20228	1.16419e-09	2.12422e-08	11.5532
LRCH3	0.330071	3.68918	6.20073	1.17494e-09	2.14159e-08	11.5443
GRB10	0.538456	4.15546	6.19822	1.19244e-09	2.17121e-08	11.5301
C15orf39	0.358498	4.979	6.19764	1.19656e-09	2.17573e-08	11.5267
PSMB6	0.284673	7.76559	6.19752	1.19742e-09	2.17573e-08	11.5261
TRIP13	0.478003	5.47454	6.19664	1.20362e-09	2.18472e-08	11.5211
NIFK	0.317755	5.55335	6.19309	1.2291e-09	2.22864e-08	11.5009
SPR	0.415488	6.48044	6.19195	1.23734e-09	2.24125e-08	11.4944
SURF6	0.387696	4.94918	6.18888	1.25997e-09	2.27986e-08	11.477
MED20	0.310887	4.79852	6.18711	1.27319e-09	2.29918e-08	11.4669
GPATCH2	0.274099	3.20879	6.1871	1.27329e-09	2.29918e-08	11.4668
PPP2R1B	0.320284	4.38339	6.18619	1.28006e-09	2.30862e-08	11.4617
CCNA1	1.09507	2.7202	6.18605	1.28116e-09	2.30862e-08	11.4609
SLC20A2	0.544397	5.89443	6.18479	1.29073e-09	2.32344e-08	11.4537
PRDX6	0.324163	8.61084	6.1841	1.29596e-09	2.33046e-08	11.4498
BZW1	0.317285	5.75752	6.18147	1.31614e-09	2.36429e-08	11.4349
KLHL5	0.434539	4.95706	6.1798	1.32921e-09	2.38531e-08	11.4254
CHORDC1	0.362133	3.60713	6.17943	1.33205e-09	2.38603e-08	11.4233
LAMC2	0.960107	7.47639	6.17939	1.33235e-09	2.38603e-08	11.4231
EIF4G2	0.28933	8.7263	6.17832	1.34077e-09	2.39864e-08	11.417
VGLL4	0.419813	4.33717	6.17691	1.35194e-09	2.41614e-08	11.4091
KIF16B	0.401351	3.84106	6.17517	1.36589e-09	2.43857e-08	11.3992
GBE1	0.359603	4.67414	6.17155	1.39525e-09	2.48843e-08	11.3787
CSRNP2	0.272206	4.61875	6.17025	1.40595e-09	2.50494e-08	11.3713
SLC9A7	0.440229	3.56602	6.16938	1.41321e-09	2.51414e-08	11.3663
CHD1	0.290175	3.51718	6.16928	1.414e-09	2.51414e-08	11.3658
YY1AP1	0.301126	4.95399	6.16855	1.4201e-09	2.52241e-08	11.3616
SNRNP200	0.372273	6.62275	6.16815	1.42341e-09	2.52571e-08	11.3594
NSMF	0.403731	5.02596	6.16757	1.42826e-09	2.53174e-08	11.3561
CBX1	0.415806	6.83746	6.1667	1.43565e-09	2.54226e-08	11.3511
TRIM16	0.61764	4.3785	6.16351	1.46278e-09	2.58742e-08	11.3331
FAM222B	0.321489	4.35911	6.16335	1.46413e-09	2.58742e-08	11.3322
NRCAM	1.00586	3.65329	6.16218	1.47422e-09	2.60262e-08	11.3256
NAIF1	0.247162	3.47205	6.16175	1.47794e-09	2.60654e-08	11.3232
TRIP12	0.289394	5.46579	6.16157	1.4795e-09	2.60664e-08	11.3221
PROSER2	0.529401	3.73915	6.1606	1.48794e-09	2.61829e-08	11.3167
BRCA1	0.436437	3.26163	6.16047	1.48912e-09	2.61829e-08	11.3159
PARP1	0.370096	5.49337	6.15824	1.50869e-09	2.65003e-08	11.3033
P3H1	0.35562	4.65742	6.15762	1.51423e-09	2.65708e-08	11.2998
PSMB4	0.287787	8.70766	6.15635	1.52556e-09	2.67426e-08	11.2926
NCLN	0.305772	6.36627	6.15295	1.55625e-09	2.72291e-08	11.2734
MLLT11	0.793058	4.36803	6.15293	1.55644e-09	2.72291e-08	11.2733
RBM28	0.312705	3.26282	6.15211	1.564e-09	2.73339e-08	11.2686
ANKRD17	0.356614	4.95769	6.15109	1.57337e-09	2.747e-08	11.2629
NIPA2	0.303907	4.70315	6.15058	1.57809e-09	2.75249e-08	11.26
PCGF2	0.35561	4.14414	6.15017	1.58184e-09	2.75627e-08	11.2577
TMEM87B	0.287678	5.20185	6.14978	1.58552e-09	2.75992e-08	11.2554
TSTD2	0.320497	2.7408	6.14775	1.6045e-09	2.79017e-08	11.244
MBTPS1	0.281065	5.54851	6.14652	1.61603e-09	2.80741e-08	11.2371
SNTB2	0.322683	3.93379	6.14615	1.61959e-09	2.81078e-08	11.235
CTSV	0.703622	4.41483	6.14459	1.63449e-09	2.83382e-08	11.2261
IQCJ-SCHIP1	0.39291	1.70759	6.14229	1.6566e-09	2.8693e-08	11.2132
GOLT1B	0.378815	5.97666	6.14205	1.65899e-09	2.87059e-08	11.2118
ADAM10	0.312747	4.90171	6.1417	1.66232e-09	2.87349e-08	11.2098
TMTC1	0.74068	3.08612	6.13997	1.67932e-09	2.89999e-08	11.2
ABCA1	0.460242	4.27118	6.13728	1.70595e-09	2.94306e-08	11.1849
RLIM	0.264576	4.3488	6.13428	1.73614e-09	2.99218e-08	11.168
TCTN2	0.386777	3.44461	6.13267	1.75253e-09	3.01743e-08	11.1589
NME6	0.19229	3.14724	6.13215	1.75788e-09	3.02365e-08	11.156
PTPRA	0.299848	6.09664	6.1318	1.76148e-09	3.02685e-08	11.154
SMOX	0.498124	4.653	6.13114	1.76833e-09	3.03563e-08	11.1503
MRPL50	0.329632	4.73795	6.13081	1.77174e-09	3.03699e-08	11.1484
HSP90AA1	0.348235	9.72011	6.13073	1.77261e-09	3.03699e-08	11.1479
SMC1A	0.377419	5.41069	6.13055	1.77444e-09	3.03713e-08	11.147
USP42	0.297194	3.50965	6.12958	1.7845e-09	3.05136e-08	11.1415
PLEKHG7	-0.426557	0.755447	-6.12816	1.79941e-09	3.07383e-08	11.1335
ZDHHC18	0.299968	5.22718	6.1272	1.80951e-09	3.08806e-08	11.1281
IL1RAP	0.624488	4.05589	6.12698	1.81184e-09	3.089e-08	11.1269
ALMS1	0.407115	3.15239	6.12518	1.83097e-09	3.11577e-08	11.1167
FADS1	0.582276	4.43224	6.12517	1.83112e-09	3.11577e-08	11.1167
SENP1	0.296937	4.09518	6.12419	1.84164e-09	3.13061e-08	11.1111
PRKRA	0.267813	3.20074	6.1238	1.84587e-09	3.13473e-08	11.1089
WDR53	0.375462	5.17455	6.12206	1.86466e-09	3.16357e-08	11.0992
G3BP1	0.24381	5.08285	6.12163	1.86935e-09	3.16843e-08	11.0967
DYNC1H1	0.408149	4.99137	6.12027	1.88428e-09	3.19063e-08	11.0891
EPN2	0.365798	3.15523	6.11851	1.90375e-09	3.22047e-08	11.0792
ARIH1	0.268749	3.72701	6.11617	1.92993e-09	3.26159e-08	11.066
ULBP1	0.652354	2.2301	6.1149	1.9443e-09	3.28083e-08	11.0589
G3BP2	0.323289	5.13258	6.11483	1.94509e-09	3.28083e-08	11.0585
SPTAN1	0.338109	5.43033	6.11363	1.95877e-09	3.29937e-08	11.0517
RIC8A	0.256512	5.71053	6.11353	1.95987e-09	3.29937e-08	11.0512
PSMD6	0.199604	4.38674	6.11104	1.98856e-09	3.34443e-08	11.0372
IGSF3	0.618397	5.87709	6.10962	2.00507e-09	3.36802e-08	11.0292
ETV4	0.797833	4.59197	6.10951	2.00646e-09	3.36802e-08	11.0285
COX10	0.275149	3.22859	6.10726	2.03291e-09	3.40914e-08	11.0159
NCAPG2	0.411772	4.35947	6.10668	2.0398e-09	3.41739e-08	11.0127
MYORG	0.536976	3.64724	6.10543	2.05471e-09	3.43907e-08	11.0057
DROSHA	0.409286	5.20395	6.10297	2.0843e-09	3.48525e-08	10.9919
CCDC51	0.393301	4.79567	6.10208	2.09523e-09	3.50016e-08	10.9868
XPO6	0.303752	5.88232	6.10188	2.09769e-09	3.50091e-08	10.9857
SLC35B2	0.323015	6.611	6.10036	2.11629e-09	3.52857e-08	10.9772
KIAA1549L	0.791076	1.93894	6.10014	2.11905e-09	3.52979e-08	10.9759
TFE3	0.272919	5.86146	6.09633	2.16654e-09	3.60242e-08	10.9546
RARS1	0.227027	5.86175	6.09631	2.16679e-09	3.60242e-08	10.9545
BTBD10	0.33195	5.40122	6.09311	2.20757e-09	3.66672e-08	10.9365
MMADHC	0.274703	7.11639	6.09291	2.21011e-09	3.66744e-08	10.9354
RXYLT1	0.274627	2.45483	6.09158	2.22725e-09	3.69236e-08	10.928
CRTC2	0.272471	5.84965	6.09119	2.23231e-09	3.69723e-08	10.9258
METTL16	0.299788	3.67914	6.08945	2.25507e-09	3.73136e-08	10.916
RILPL1	0.271638	2.3088	6.08926	2.2575e-09	3.73185e-08	10.915
SH3BP4	0.406886	5.48544	6.0879	2.27544e-09	3.75794e-08	10.9073
POLR3F	0.289986	4.30394	6.08663	2.2923e-09	3.78122e-08	10.9002
OSBP	0.276985	5.5774	6.08651	2.29389e-09	3.78122e-08	10.8996
CDC42EP3	0.483422	4.08507	6.08622	2.2978e-09	3.78408e-08	10.8979
DDOST	0.271906	8.43184	6.08491	2.31528e-09	3.80927e-08	10.8906
SMC5	0.348105	4.38893	6.08456	2.32008e-09	3.81356e-08	10.8886
AP3M1	0.285844	5.05651	6.08428	2.32383e-09	3.81613e-08	10.8871
HNRNPLL	0.235108	4.64312	6.08356	2.3336e-09	3.82856e-08	10.883
USP34	0.40723	3.87295	6.08059	2.37419e-09	3.89148e-08	10.8664
SDAD1	0.300549	5.49643	6.07869	2.40051e-09	3.93092e-08	10.8558
CSNK2A3	0.20255	0.666703	6.07838	2.40481e-09	3.93425e-08	10.8541
NT5C3B	0.380801	5.69034	6.07495	2.45326e-09	4.00656e-08	10.8349
DKC1	0.374425	6.63834	6.07492	2.45361e-09	4.00656e-08	10.8347
ATXN7L3	0.293575	5.88605	6.07292	2.4823e-09	4.04962e-08	10.8235
MYO5A	0.459797	3.93084	6.07247	2.4888e-09	4.05642e-08	10.821
CDV3	0.308547	7.31286	6.07114	2.50801e-09	4.0839e-08	10.8136
URI1	0.391691	5.89502	6.06781	2.557e-09	4.15947e-08	10.795
HUWE1	0.387942	5.81134	6.06766	2.5592e-09	4.15947e-08	10.7941
TBCCD1	0.395934	4.57731	6.06642	2.57762e-09	4.18551e-08	10.7872
SAV1	0.325196	4.31849	6.06605	2.58321e-09	4.19067e-08	10.7852
STK32B	0.633185	1.51485	6.06526	2.59502e-09	4.20592e-08	10.7808
PMPCA	0.280645	4.83282	6.06235	2.63926e-09	4.27364e-08	10.7645
MRPS30	0.332702	4.77646	6.06139	2.65393e-09	4.2934e-08	10.7591
CRIM1	0.430623	5.10988	6.06091	2.66138e-09	4.29916e-08	10.7564
DARS2	0.387043	4.28397	6.06084	2.66243e-09	4.29916e-08	10.7561
NBAS	0.297967	4.30427	6.05736	2.7166e-09	4.38256e-08	10.7367
BICD2	0.528082	5.83084	6.05699	2.72236e-09	4.38778e-08	10.7346
PTGFRN	0.515549	6.77652	6.05511	2.75226e-09	4.43188e-08	10.7241
MXRA7	0.410935	5.04251	6.05368	2.77501e-09	4.46439e-08	10.7162
FAT1	0.610469	5.17485	6.05195	2.80304e-09	4.50532e-08	10.7065
CARD19	0.324487	4.5966	6.05118	2.81546e-09	4.52109e-08	10.7022
TTBK2	0.311135	2.15477	6.04948	2.84343e-09	4.5618e-08	10.6927
GID4	0.3281	3.44338	6.04556	2.90857e-09	4.66201e-08	10.6709
SNRNP27	0.254564	5.10848	6.0447	2.923e-09	4.68083e-08	10.6661
ZNF830	0.289674	4.6335	6.04322	2.9481e-09	4.71669e-08	10.6579
ELAC2	0.282165	5.00043	6.04237	2.96264e-09	4.7356e-08	10.6532
GON4L	0.347196	3.85801	6.04107	2.98501e-09	4.76698e-08	10.6459
CEP19	0.553187	3.68226	6.04087	2.98848e-09	4.76791e-08	10.6448
E2F7	0.525791	3.23622	6.04072	2.99107e-09	4.76791e-08	10.644
URM1	0.259605	5.39363	6.04008	3.00215e-09	4.78119e-08	10.6404
CABYR	0.842713	2.98925	6.03901	3.02078e-09	4.80646e-08	10.6344
LDLRAD3	0.483114	3.83359	6.0362	3.07008e-09	4.88044e-08	10.6189
ERC1	0.375012	3.95742	6.02737	3.23061e-09	5.13096e-08	10.5698
RDX	0.327493	5.10492	6.02587	3.25878e-09	5.17097e-08	10.5614
ERCC6L2	0.273491	2.21406	6.02305	3.31209e-09	5.25078e-08	10.5458
ATP6V1E2	0.42573	2.81286	6.0223	3.32638e-09	5.26864e-08	10.5417
PSMC1	0.289124	3.56711	6.01962	3.3783e-09	5.34601e-08	10.5267
HJURP	0.446964	4.61346	6.0189	3.39231e-09	5.36331e-08	10.5228
KDSR	0.297987	4.77726	6.01725	3.4246e-09	5.40944e-08	10.5136
DNAJB1	0.405344	6.5954	6.01591	3.45121e-09	5.44645e-08	10.5062
PNPT1	0.341702	5.16231	6.01576	3.45429e-09	5.44645e-08	10.5053
ATF1	0.284205	5.03295	6.01541	3.46109e-09	5.45223e-08	10.5034
ASPHD2	0.378755	2.50644	6.01461	3.47718e-09	5.47263e-08	10.499
SEPTIN7	0.240514	4.98576	6.01371	3.49514e-09	5.49592e-08	10.494
RMC1	0.308292	4.5273	6.01308	3.50783e-09	5.5109e-08	10.4905
MRPL47	0.395494	7.26033	6.0113	3.54396e-09	5.56265e-08	10.4807
KDELR3	0.503298	5.58152	6.01091	3.55203e-09	5.57029e-08	10.4785
LARP6	0.490421	3.41563	6.01056	3.5591e-09	5.57039e-08	10.4765
RAD54L2	0.335498	3.14941	6.01048	3.56081e-09	5.57039e-08	10.4761
PDCL3	0.277927	5.94222	6.01044	3.5617e-09	5.57039e-08	10.4758
TWF1	0.336511	6.19268	6.00992	3.57218e-09	5.57841e-08	10.473
DDR1	0.45641	7.48386	6.00987	3.57323e-09	5.57841e-08	10.4727
CHCHD3	0.298223	5.5222	6.00962	3.5785e-09	5.58121e-08	10.4713
LAMB3	0.771669	8.13076	6.00947	3.58144e-09	5.58121e-08	10.4705
ZXDA	0.279694	1.98729	6.00925	3.58605e-09	5.58138e-08	10.4693
CAV2	0.5333	5.51882	6.00904	3.59031e-09	5.58138e-08	10.4681
EHHADH	0.418644	4.15656	6.009	3.59117e-09	5.58138e-08	10.4679
FAM91A1	0.271268	5.37952	6.00136	3.7525e-09	5.82331e-08	10.4256
ADM2	0.575293	3.21797	6.00131	3.75352e-09	5.82331e-08	10.4253
ZC3H18	0.30665	4.48493	6.00004	3.78105e-09	5.85786e-08	10.4183
ZBTB33	0.336746	4.9123	5.99997	3.78252e-09	5.85786e-08	10.4179
KHDRBS1	0.239185	7.46819	5.99953	3.79216e-09	5.86291e-08	10.4155
HERPUD2	0.242234	5.18621	5.99951	3.79252e-09	5.86291e-08	10.4154
FOSL1	0.763475	5.09626	5.99699	3.84794e-09	5.94331e-08	10.4014
SLC38A7	0.323514	4.04986	5.99598	3.87026e-09	5.97249e-08	10.3959
CEP78	0.32256	2.67924	5.99556	3.87957e-09	5.98156e-08	10.3935
LYAR	0.331411	5.05907	5.99395	3.91558e-09	6.02916e-08	10.3847
TIMM22	0.261924	4.56222	5.99387	3.91738e-09	6.02916e-08	10.3842
TAF6	0.308047	4.74557	5.99337	3.92863e-09	6.04114e-08	10.3814
TIMM17A	0.228642	5.74938	5.9896	4.0147e-09	6.16803e-08	10.3606
MAP3K13	0.427677	4.56386	5.98821	4.04682e-09	6.21165e-08	10.3529
SMG6	0.342025	2.90838	5.98806	4.05022e-09	6.21165e-08	10.3521
CWF19L2	0.28102	4.07449	5.98424	4.13993e-09	6.34364e-08	10.331
ZNF488	0.571328	2.26772	5.98408	4.14381e-09	6.344e-08	10.3301
PRDM4	0.292035	4.62862	5.98024	4.23612e-09	6.47963e-08	10.3089
SLC2A8	0.353201	4.22586	5.97946	4.25503e-09	6.49536e-08	10.3046
HEATR1	0.351888	4.447	5.97938	4.25702e-09	6.49536e-08	10.3042
PPP1R15B	0.261893	5.82026	5.97935	4.2576e-09	6.49536e-08	10.304
CD109	0.684642	5.14766	5.97832	4.28284e-09	6.52814e-08	10.2984
DCAF17	0.27698	3.53111	5.97792	4.29266e-09	6.53739e-08	10.2962
PLEKHG6	0.595548	4.2832	5.97754	4.3021e-09	6.54603e-08	10.294
FBXL14	0.396534	4.06367	5.9773	4.30805e-09	6.54936e-08	10.2927
IQGAP1	0.312252	6.6667	5.97633	4.33208e-09	6.57836e-08	10.2874
ACVR1	0.349559	5.33693	5.97622	4.33468e-09	6.57836e-08	10.2868
ETV3	0.34214	4.75843	5.97553	4.35193e-09	6.59745e-08	10.283
YY2	0.224897	0.961148	5.97541	4.35484e-09	6.59745e-08	10.2823
PTPN14	0.456218	3.6404	5.97467	4.37327e-09	6.61961e-08	10.2782
MAPK1	0.333126	6.52242	5.9741	4.38761e-09	6.63555e-08	10.2751
PFDN2	0.34243	8.3319	5.97307	4.41351e-09	6.66893e-08	10.2694
RBMS1	0.292252	4.69818	5.97261	4.42515e-09	6.68071e-08	10.2669
SLC20A1	0.339174	5.38123	5.97179	4.44595e-09	6.70459e-08	10.2624
LARP1	0.332266	6.39704	5.97169	4.44867e-09	6.70459e-08	10.2618
ALG12	0.28787	3.29436	5.97051	4.47862e-09	6.74389e-08	10.2553
SERINC3	0.273049	6.91009	5.96987	4.49524e-09	6.76307e-08	10.2518
SPECC1L	0.31441	3.981	5.96774	4.55021e-09	6.83986e-08	10.2401
NRG1	0.539141	1.64845	5.96409	4.64616e-09	6.97806e-08	10.22
TBL2	0.281984	4.97426	5.96131	4.7206e-09	7.08375e-08	10.2047
SPAG5	0.485165	4.60503	5.96058	4.74035e-09	7.10726e-08	10.2007
ZCCHC3	0.349525	5.18653	5.9601	4.75334e-09	7.1206e-08	10.198
SCRN1	0.439167	5.71452	5.95927	4.77607e-09	7.1485e-08	10.1934
SF3B6	0.292088	7.80636	5.95888	4.7866e-09	7.15811e-08	10.1913
DCAF7	0.313956	6.28865	5.9556	4.87718e-09	7.2873e-08	10.1733
DVL2	0.377409	4.90622	5.95387	4.9257e-09	7.35348e-08	10.1638
MFSD9	0.297223	3.50848	5.95357	4.93405e-09	7.35964e-08	10.1621
PKP2	0.597964	3.52683	5.95325	4.94323e-09	7.36702e-08	10.1603
TCOF1	0.350081	4.41179	5.95308	4.94779e-09	7.36751e-08	10.1595
COPZ1	0.242815	7.24976	5.95044	5.02291e-09	7.47297e-08	10.145
ATP6AP1	0.257212	6.77345	5.94924	5.05758e-09	7.51813e-08	10.1383
CACYBP	0.347593	6.03493	5.94902	5.06404e-09	7.52131e-08	10.1371
DST	0.651828	4.75758	5.94874	5.07204e-09	7.52676e-08	10.1356
LMNA	0.356117	7.48141	5.94831	5.08445e-09	7.53876e-08	10.1332
ZNF282	0.332473	5.33963	5.94763	5.10411e-09	7.56147e-08	10.1295
PREPL	0.31699	4.08282	5.94385	5.21552e-09	7.71994e-08	10.1087
MED10	0.337372	6.35623	5.9415	5.28589e-09	7.81746e-08	10.0958
EDEM1	0.330749	5.37863	5.94034	5.32084e-09	7.86246e-08	10.0895
SDE2	0.301874	5.20408	5.93858	5.37449e-09	7.93333e-08	10.0799
COQ10B	0.261099	5.45861	5.93847	5.37791e-09	7.93333e-08	10.0792
E2F4	0.287311	6.35025	5.93784	5.39707e-09	7.95485e-08	10.0758
TCF20	0.399099	5.19552	5.93747	5.40859e-09	7.96509e-08	10.0738
VPS54	0.306809	4.77151	5.9352	5.47911e-09	8.06212e-08	10.0613
SGPL1	0.305164	5.80112	5.9347	5.49447e-09	8.0773e-08	10.0586
UGDH	0.601075	6.43961	5.93457	5.49871e-09	8.0773e-08	10.0579
PELI3	0.34318	3.44946	5.93308	5.54549e-09	8.13915e-08	10.0497
ARHGEF5	0.453468	4.098	5.93247	5.56482e-09	8.16064e-08	10.0464
CENPL	0.340744	3.32202	5.93222	5.57282e-09	8.16549e-08	10.045
HTATIP2	0.413046	6.31512	5.93047	5.62855e-09	8.24022e-08	10.0354
NOP58	0.322804	6.00734	5.92931	5.6659e-09	8.28626e-08	10.0291
TTC27	0.279322	4.65121	5.92919	5.66952e-09	8.28626e-08	10.0284
FYTTD1	0.351473	5.83611	5.92847	5.69302e-09	8.31362e-08	10.0245
LRRC8C	0.337559	2.78756	5.92682	5.7467e-09	8.38498e-08	10.0154
PRKAB2	0.357976	4.38155	5.92561	5.78615e-09	8.43547e-08	10.0088
EDC3	0.280381	4.59253	5.92479	5.81331e-09	8.46797e-08	10.0043
SKA1	0.442671	3.96543	5.92414	5.83474e-09	8.48959e-08	10.0008
RAB3IL1	0.424512	3.60227	5.92405	5.8379e-09	8.48959e-08	10.0003
TTC30A	0.383805	3.04418	5.92371	5.84929e-09	8.49905e-08	9.9984
SLF1	0.282988	2.4912	5.92133	5.92898e-09	8.60765e-08	9.98538
WDR33	0.234473	4.16783	5.9204	5.96028e-09	8.64588e-08	9.98032
SUN2	0.378909	5.61391	5.92006	5.97165e-09	8.65517e-08	9.97849
GPC1	0.707523	7.37127	5.9187	6.01802e-09	8.71512e-08	9.97104
RNF167	0.249535	6.86134	5.91602	6.11046e-09	8.84163e-08	9.95638
RGS20	0.587876	1.97759	5.91561	6.12461e-09	8.85474e-08	9.95415
ZNF687	0.350383	4.80688	5.91469	6.15673e-09	8.89379e-08	9.94912
ERFE	0.574057	1.94881	5.91234	6.23958e-09	9.00601e-08	9.93626
HPS5	0.296977	4.19205	5.91062	6.30053e-09	9.08644e-08	9.92691
ANKFY1	0.314695	3.65482	5.90736	6.41837e-09	9.24872e-08	9.90909
PRPSAP2	0.360767	4.71757	5.90663	6.44501e-09	9.27943e-08	9.9051
CDK16	0.303385	6.17108	5.90625	6.45874e-09	9.29151e-08	9.90305
POLE3	0.335828	6.90532	5.90551	6.48601e-09	9.32303e-08	9.899
SPTBN1	0.360893	5.63387	5.90458	6.52035e-09	9.36467e-08	9.89392
AGO2	0.366297	4.2606	5.90248	6.59825e-09	9.46874e-08	9.8825
RBFOX2	0.32175	5.06686	5.9015	6.63517e-09	9.51387e-08	9.87713
CDC5L	0.283398	5.10871	5.90086	6.65928e-09	9.54059e-08	9.87364
HSPA8	0.323164	9.52013	5.90029	6.68079e-09	9.56352e-08	9.87054
TOP3A	0.336218	3.87291	5.89979	6.69984e-09	9.58291e-08	9.8678
ABCF2	0.290042	3.96174	5.89835	6.75455e-09	9.65324e-08	9.85998
ALDH1B1	0.415144	5.24824	5.89756	6.78495e-09	9.6886e-08	9.85566
HDLBP	0.302962	7.43814	5.89742	6.79043e-09	9.6886e-08	9.85488
SLCO3A1	0.530055	4.35592	5.89604	6.84368e-09	9.75659e-08	9.84737
LRRC41	0.273179	5.30425	5.89487	6.8891e-09	9.8133e-08	9.84101
HMGCR	0.350116	5.20397	5.89308	6.95935e-09	9.90527e-08	9.83125
HNRNPR	0.267304	5.96777	5.89126	7.03138e-09	9.99962e-08	9.82134
B3GNT5	0.577153	5.04827	5.88772	7.17363e-09	1.01936e-07	9.80208
ZNF146	0.380253	6.5875	5.88605	7.24166e-09	1.02819e-07	9.793
SLC35E4	0.366887	2.27069	5.88478	7.2939e-09	1.03476e-07	9.78609
SLC35A2	0.279669	5.62907	5.88422	7.31709e-09	1.0372e-07	9.78303
NOM1	0.334065	3.75408	5.88368	7.33971e-09	1.03956e-07	9.78007
EIF3B	0.298384	6.77994	5.88311	7.36328e-09	1.04205e-07	9.77698
GPR89A	0.193633	1.86582	5.8828	7.37603e-09	1.04301e-07	9.77532
SPRYD7	0.307118	4.00007	5.8825	7.38849e-09	1.04392e-07	9.7737
IL31RA	0.405698	0.87427	5.88139	7.43534e-09	1.04969e-07	9.76762
RXRA	0.436494	4.86416	5.88117	7.44436e-09	1.05011e-07	9.76645
PSTPIP2	0.50346	3.96031	5.88064	7.46674e-09	1.05242e-07	9.76356
LAMP2	0.310481	6.6447	5.88031	7.48057e-09	1.05351e-07	9.76178
GPAT3	0.811342	3.12507	5.87968	7.50755e-09	1.05646e-07	9.75832
MAFF	0.38129	4.14839	5.87406	7.74944e-09	1.08962e-07	9.72782
TMEM131	0.323992	4.62156	5.87226	7.82889e-09	1.0999e-07	9.71802
MAPRE1	0.284659	7.82664	5.87009	7.92533e-09	1.11255e-07	9.70624
LPGAT1	0.350509	4.87086	5.86679	8.0741e-09	1.13252e-07	9.68836
COPG1	0.272806	7.70064	5.86596	8.11184e-09	1.1369e-07	9.68387
BBX	0.336318	4.34495	5.86411	8.19696e-09	1.1479e-07	9.67383
ZNF462	0.495645	2.987	5.8622	8.28577e-09	1.15941e-07	9.66347
P2RX4	0.31456	3.71069	5.86198	8.29607e-09	1.15992e-07	9.66228
CTR9	0.303746	4.99179	5.86169	8.30975e-09	1.1609e-07	9.66069
DNAAF5	0.30367	4.53442	5.85851	8.46008e-09	1.1806e-07	9.64345
AK4	0.500294	4.27876	5.85842	8.46437e-09	1.1806e-07	9.64297
ZNF217	0.359326	5.40698	5.85635	8.56331e-09	1.19345e-07	9.63179
NOL10	0.280413	5.00133	5.85523	8.61757e-09	1.20005e-07	9.62572
YES1	0.355446	5.7687	5.85437	8.65961e-09	1.20494e-07	9.62104
TNC	0.970986	6.7242	5.85302	8.72559e-09	1.21315e-07	9.61374
ZBTB39	0.359937	3.24496	5.85274	8.73959e-09	1.21413e-07	9.6122
HDGFL3	0.372621	3.73546	5.85061	8.8447e-09	1.22775e-07	9.6007
TOR3A	0.353608	6.50621	5.85	8.87541e-09	1.23103e-07	9.59737
NDUFS2	0.275395	5.3921	5.84773	8.98948e-09	1.24586e-07	9.58509
RTN4R	0.539981	3.78868	5.84569	9.09317e-09	1.25923e-07	9.57407
MFN1	0.384692	5.5801	5.845	9.12842e-09	1.2631e-07	9.57035
UBP1	0.263209	4.76898	5.84444	9.15724e-09	1.26609e-07	9.56731
PICALM	0.268017	6.51757	5.84256	9.25447e-09	1.27851e-07	9.55716
VDAC1	0.245124	7.74128	5.84178	9.29536e-09	1.28314e-07	9.55292
TRIM25	0.316945	4.30944	5.8407	9.35198e-09	1.28994e-07	9.54708
TMEM87A	0.281766	5.45344	5.84033	9.37131e-09	1.29158e-07	9.5451
TIMELESS	0.399746	5.43461	5.83987	9.39568e-09	1.29388e-07	9.5426
BRAP	0.245613	4.4674	5.83973	9.40291e-09	1.29388e-07	9.54186
NEDD4L	0.385975	3.16696	5.83954	9.41287e-09	1.29423e-07	9.54084
SMPD4	0.296929	5.32916	5.83805	9.49223e-09	1.30411e-07	9.53277
DIAPH3	0.343339	2.58354	5.8371	9.54267e-09	1.31001e-07	9.52768
USP37	0.318259	2.24439	5.83458	9.67907e-09	1.32769e-07	9.51403
NCBP2	0.351895	6.58101	5.83431	9.69344e-09	1.32861e-07	9.51261
PNO1	0.336625	5.65933	5.83408	9.70597e-09	1.32928e-07	9.51136
KCTD18	0.277686	3.89038	5.83355	9.7351e-09	1.33222e-07	9.50848
TUSC3	0.594439	5.37642	5.83227	9.80522e-09	1.34077e-07	9.50158
CDC25A	0.404547	3.38412	5.83183	9.82939e-09	1.34302e-07	9.49922
PUS7	0.383692	4.81981	5.83129	9.85921e-09	1.34603e-07	9.4963
PIGO	0.374751	4.55855	5.83013	9.92391e-09	1.3538e-07	9.49002
DEDD	0.244632	5.2853	5.82713	1.00924e-08	1.37571e-07	9.47383
KNSTRN	0.360773	4.73652	5.82614	1.01486e-08	1.38229e-07	9.46849
TAF15	0.394723	6.26196	5.82579	1.01682e-08	1.38388e-07	9.46664
SGO2	0.363057	3.16915	5.82508	1.0209e-08	1.38835e-07	9.46279
PHC3	0.369064	4.01061	5.82486	1.02213e-08	1.38893e-07	9.46163
SETD5	0.30363	4.86555	5.82459	1.02371e-08	1.38999e-07	9.46015
VIRMA	0.265606	4.48765	5.82423	1.02578e-08	1.39172e-07	9.4582
POLR2H	0.393007	6.62271	5.82405	1.02682e-08	1.39204e-07	9.45724
RANBP9	0.292077	5.37243	5.82274	1.03436e-08	1.40118e-07	9.4502
NCAPG	0.384911	3.89192	5.82108	1.04407e-08	1.41323e-07	9.44122
KIAA0100	0.344986	5.38287	5.82089	1.04516e-08	1.41361e-07	9.44021
CDK7	0.238639	4.93182	5.8175	1.06523e-08	1.43963e-07	9.42193
GOLGA3	0.318442	5.00328	5.81705	1.0679e-08	1.44213e-07	9.41952
BEND6	0.391975	1.71567	5.81682	1.06926e-08	1.44283e-07	9.4183
NCOR1	0.332243	4.25913	5.81663	1.07041e-08	1.44328e-07	9.41726
NAT10	0.358376	5.78891	5.81469	1.08208e-08	1.45697e-07	9.40685
CFAP20DC	0.37441	1.7756	5.81467	1.08225e-08	1.45697e-07	9.4067
CMAS	0.366965	6.59685	5.81425	1.08478e-08	1.45919e-07	9.40445
VCP	0.341327	7.33654	5.81412	1.08557e-08	1.45919e-07	9.40375
JMJD6	0.24929	4.11564	5.81306	1.09203e-08	1.46674e-07	9.39805
MAP4	0.297764	5.57711	5.81085	1.10562e-08	1.48385e-07	9.38616
NUMBL	0.426156	4.35758	5.80987	1.11169e-08	1.49084e-07	9.3809
TBL1XR1	0.422891	6.30062	5.80965	1.11306e-08	1.49153e-07	9.37971
ACAP2	0.440255	5.20462	5.80905	1.11683e-08	1.49543e-07	9.37646
SCO1	0.246042	3.17164	5.80888	1.11787e-08	1.49568e-07	9.37557
FIGNL1	0.38229	4.12024	5.80754	1.12631e-08	1.50581e-07	9.36834
DDX1	0.287157	5.47291	5.80409	1.14825e-08	1.53397e-07	9.34979
ITGB1	0.38646	6.15979	5.80296	1.15553e-08	1.54251e-07	9.34372
CDK8	0.280474	4.25012	5.80256	1.15808e-08	1.54473e-07	9.3416
TMEM25	0.382357	3.60309	5.80216	1.16071e-08	1.54705e-07	9.33942
BACH1	0.329715	4.65137	5.80165	1.164e-08	1.55025e-07	9.3367
DNTTIP2	0.267042	5.14538	5.80148	1.1651e-08	1.55052e-07	9.3358
SLC35G1	0.708523	3.12453	5.80092	1.16873e-08	1.55417e-07	9.3328
TMEM17	0.425085	3.06812	5.79896	1.18164e-08	1.569e-07	9.32225
NGLY1	0.216217	3.3765	5.79892	1.1819e-08	1.569e-07	9.32204
CRIP3	-0.335164	0.478973	-5.7988	1.18271e-08	1.569e-07	9.32138
MSL1	0.29069	5.34179	5.79868	1.18349e-08	1.569e-07	9.32074
EIF1	0.263061	9.18478	5.79437	1.21233e-08	1.60601e-07	9.29761
MPHOSPH10	0.264411	5.31417	5.79273	1.22345e-08	1.61951e-07	9.28883
GPD2	0.372273	5.3391	5.79242	1.22558e-08	1.6211e-07	9.28716
TMPPE	0.256596	1.5642	5.78991	1.24288e-08	1.64274e-07	9.27368
GIT1	0.379772	5.88035	5.78936	1.2467e-08	1.64653e-07	9.27074
MAP1A	0.579046	2.73136	5.78793	1.25669e-08	1.65768e-07	9.26307
PFKFB3	0.435223	5.94987	5.78788	1.25704e-08	1.65768e-07	9.2628
TGFBRAP1	0.292794	4.45909	5.78626	1.26841e-08	1.6714e-07	9.25415
ITPRID2	0.401183	5.80014	5.78613	1.26937e-08	1.6714e-07	9.25342
SBNO1	0.291484	4.35516	5.78516	1.27627e-08	1.67921e-07	9.24821
OLA1	0.319026	5.9532	5.78415	1.28348e-08	1.68743e-07	9.2428
SPC25	0.404426	4.19053	5.78302	1.29159e-08	1.6968e-07	9.23675
GTF2F1	0.280964	6.65121	5.78283	1.2929e-08	1.69725e-07	9.23577
BYSL	0.314667	5.91252	5.7815	1.30252e-08	1.70859e-07	9.22865
EXTL3	0.364167	4.05662	5.78131	1.3039e-08	1.70911e-07	9.22763
HNRNPC	0.214958	7.64598	5.77801	1.32814e-08	1.73957e-07	9.20993
DCTD	0.275361	6.12069	5.77598	1.34323e-08	1.75801e-07	9.19907
MTPN	0.286141	7.71779	5.77297	1.3659e-08	1.78635e-07	9.18299
ZNF367	0.459377	3.46136	5.77243	1.37003e-08	1.7904e-07	9.18009
KLC2	0.344424	4.59413	5.77061	1.38399e-08	1.80728e-07	9.17035
VPS53	0.256255	2.95489	5.77015	1.38756e-08	1.81059e-07	9.16787
RB1CC1	0.344961	5.18193	5.7684	1.4011e-08	1.82688e-07	9.15855
HROB	0.436292	3.78192	5.76768	1.40674e-08	1.83286e-07	9.15469
DCAF6	0.303003	5.49452	5.76739	1.40905e-08	1.83309e-07	9.15311
CRKL	0.379065	6.71653	5.76721	1.41044e-08	1.83309e-07	9.15216
UBAC1	0.293949	5.98163	5.76718	1.41064e-08	1.83309e-07	9.15202
UBQLN2	0.319582	5.66326	5.76712	1.41112e-08	1.83309e-07	9.1517
CLSPN	0.38059	2.62272	5.76617	1.41864e-08	1.84052e-07	9.14659
MBOAT7	0.322531	5.86413	5.76613	1.41896e-08	1.84052e-07	9.14638
MORF4L2	0.27442	8.23732	5.76588	1.42091e-08	1.84168e-07	9.14506
SMARCA1	0.495532	4.93791	5.76546	1.42421e-08	1.84458e-07	9.14283
HNRNPH3	0.28704	5.90494	5.76459	1.43115e-08	1.8522e-07	9.13815
NONO	0.273348	6.9867	5.7628	1.44542e-08	1.86927e-07	9.12862
PDGFA	0.602935	4.58818	5.76104	1.45968e-08	1.88631e-07	9.11919
URB2	0.333436	3.83982	5.76076	1.4619e-08	1.88779e-07	9.11773
PLEKHA3	0.217594	2.61333	5.76041	1.46477e-08	1.89008e-07	9.11585
TBC1D5	0.294517	4.02268	5.75994	1.46858e-08	1.89359e-07	9.11335
DIAPH1	0.27046	6.1605	5.7591	1.47545e-08	1.90105e-07	9.10887
MGAT4B	0.30501	5.9485	5.75876	1.47825e-08	1.90325e-07	9.10704
XRCC2	0.442718	3.17103	5.75778	1.48637e-08	1.91228e-07	9.10178
SNX9	0.279057	5.38307	5.75675	1.49486e-08	1.92179e-07	9.09631
KIF18B	0.494753	4.28013	5.75554	1.50496e-08	1.93334e-07	9.08984
NAA15	0.278169	4.39398	5.75538	1.50625e-08	1.93358e-07	9.08902
DNAJC2	0.33563	4.24289	5.75209	1.53404e-08	1.9678e-07	9.07146
RNF121	0.267354	4.76365	5.75163	1.53797e-08	1.97139e-07	9.069
ABHD3	0.454032	4.7599	5.75021	1.55011e-08	1.98549e-07	9.06144
CASC3	0.323064	5.74825	5.74971	1.55442e-08	1.98954e-07	9.05878
SCYL2	0.260171	5.07567	5.74869	1.56323e-08	1.99934e-07	9.05335
MED14	0.281159	4.64143	5.74774	1.57155e-08	2.00852e-07	9.04825
ICE1	0.368818	4.77867	5.74646	1.58271e-08	2.02129e-07	9.04145
LRP8	0.481005	2.46122	5.74566	1.58974e-08	2.02879e-07	9.03719
YTHDF1	0.25144	6.36181	5.74508	1.59484e-08	2.0338e-07	9.03412
RAI1	0.426073	4.2378	5.74242	1.61852e-08	2.06249e-07	9.01996
ASPM	0.438521	3.53419	5.74219	1.62064e-08	2.06367e-07	9.0187
PURB	0.28881	5.0538	5.73982	1.642e-08	2.08935e-07	9.00612
EIF5B	0.309181	6.10569	5.73887	1.65076e-08	2.09896e-07	9.00101
ARL6IP6	0.324238	4.84252	5.73593	1.67784e-08	2.13183e-07	8.98538
SOAT1	0.320397	4.68398	5.73406	1.69526e-08	2.1524e-07	8.97546
SETSIP	0.146233	0.46507	5.7335	1.70056e-08	2.15629e-07	8.97246
BRD4	0.341643	5.13446	5.73347	1.7008e-08	2.15629e-07	8.97233
CMIP	0.345048	5.10145	5.73231	1.71181e-08	2.16716e-07	8.96613
CDCA5	0.406656	5.35132	5.7323	1.71187e-08	2.16716e-07	8.9661
MGME1	0.351458	5.81882	5.73206	1.71416e-08	2.16848e-07	8.96481
CNP	0.257656	5.6275	5.731	1.72426e-08	2.17968e-07	8.95917
RBM15B	0.270248	5.11836	5.72819	1.75123e-08	2.21217e-07	8.94426
TMX3	0.301165	4.47119	5.72793	1.75374e-08	2.21373e-07	8.94288
TBC1D2	0.458616	5.84888	5.72601	1.77248e-08	2.23576e-07	8.93268
ORC1	0.405536	3.96239	5.7246	1.78637e-08	2.25166e-07	8.92518
MCUR1	0.287892	4.73107	5.72386	1.79366e-08	2.2592e-07	8.92127
COPRS	0.299741	6.15497	5.72347	1.79753e-08	2.26244e-07	8.9192
TMEM38B	0.488438	3.90682	5.72147	1.81756e-08	2.28601e-07	8.90855
ADPGK	0.253159	5.4232	5.72072	1.82507e-08	2.29379e-07	8.90459
C6orf89	0.245423	5.44377	5.71929	1.83953e-08	2.3103e-07	8.89701
KPNA1	0.29778	4.573	5.71911	1.84133e-08	2.31089e-07	8.89607
TRIM37	0.307138	4.49251	5.71846	1.84804e-08	2.31765e-07	8.89258
KDM5C	0.330686	5.69137	5.71628	1.87043e-08	2.34404e-07	8.88102
DNAJA1	0.350105	7.70508	5.71543	1.87917e-08	2.35323e-07	8.87654
TAX1BP1	0.228873	5.81395	5.71531	1.88048e-08	2.35323e-07	8.87587
SMO	0.63903	4.84035	5.71514	1.8822e-08	2.3537e-07	8.87499
RBM15	0.232165	3.38164	5.71474	1.88634e-08	2.35717e-07	8.87289
RPL7L1	0.27765	5.84626	5.7134	1.90037e-08	2.373e-07	8.86577
SNAP47	0.241199	4.36319	5.71262	1.9086e-08	2.38157e-07	8.86162
FJX1	0.519379	4.20499	5.71223	1.91269e-08	2.38497e-07	8.85956
ARF3	0.257184	7.0322	5.71119	1.92369e-08	2.39697e-07	8.85405
DENND6A	0.231828	4.18269	5.71085	1.92731e-08	2.39977e-07	8.85225
PEX5	0.308466	5.2303	5.71058	1.93021e-08	2.40166e-07	8.8508
CNOT1	0.365195	5.61652	5.70874	1.94984e-08	2.42342e-07	8.84109
NEDD1	0.408974	4.6581	5.70868	1.95048e-08	2.42342e-07	8.84077
AP2M1	0.351347	8.86793	5.70611	1.97834e-08	2.45628e-07	8.82715
DUSP9	0.741687	3.40593	5.70552	1.98481e-08	2.46255e-07	8.82402
SEC24C	0.343463	4.93949	5.70283	2.01444e-08	2.49753e-07	8.80979
PI4KB	0.256966	5.86536	5.70239	2.01929e-08	2.50176e-07	8.80748
KIAA1191	0.240624	6.25262	5.70156	2.02859e-08	2.5115e-07	8.80307
UGCG	0.327181	5.72197	5.70089	2.03605e-08	2.51894e-07	8.79954
ITGB4	0.661314	7.78155	5.69819	2.06656e-08	2.55367e-07	8.78526
KIAA0753	0.30695	3.34655	5.69815	2.06705e-08	2.55367e-07	8.78503
ENO1	0.332875	10.3786	5.6973	2.0768e-08	2.56232e-07	8.78051
ZNF280B	0.56333	1.74817	5.69728	2.077e-08	2.56232e-07	8.78042
DDX50	0.254625	5.73978	5.69677	2.08283e-08	2.56769e-07	8.77773
ADM	0.697918	6.64809	5.6963	2.08827e-08	2.57251e-07	8.77523
SKP2	0.429298	3.58501	5.69617	2.0897e-08	2.57251e-07	8.77457
NLE1	0.325487	3.90528	5.69547	2.09775e-08	2.58061e-07	8.77087
PAIP1	0.339908	6.34044	5.69356	2.11996e-08	2.60608e-07	8.76077
GPSM1	0.471513	3.40511	5.69288	2.12788e-08	2.61397e-07	8.75718
HBEGF	0.641877	5.18235	5.68925	2.17083e-08	2.66422e-07	8.738
TMOD3	0.26387	4.79915	5.68916	2.17185e-08	2.66422e-07	8.73755
CIBAR2	-0.573729	1.42466	-5.68828	2.18238e-08	2.67526e-07	8.7329
SDHC	0.272107	7.01532	5.68707	2.19706e-08	2.69136e-07	8.72646
GNGT1	0.45476	2.37899	5.68651	2.20376e-08	2.69767e-07	8.72354
SPRYD3	0.248741	5.86511	5.67861	2.3015e-08	2.81533e-07	8.68188
PES1	0.325264	6.54497	5.67794	2.31005e-08	2.82381e-07	8.67832
PDCD6IP	0.205114	5.38887	5.67646	2.3289e-08	2.84486e-07	8.67051
UFM1	0.235723	5.54064	5.67603	2.33434e-08	2.8495e-07	8.66828
FADS2	0.653453	5.01002	5.67494	2.34837e-08	2.86462e-07	8.66252
GBF1	0.272169	4.02398	5.67475	2.35079e-08	2.86556e-07	8.66153
GBA	0.285892	5.48042	5.67409	2.35938e-08	2.87401e-07	8.65803
TPR	0.335242	5.18108	5.67139	2.39453e-08	2.91479e-07	8.64384
FTSJ3	0.311707	5.53702	5.66965	2.41749e-08	2.93893e-07	8.63467
GALNS	0.341091	4.09982	5.66964	2.41774e-08	2.93893e-07	8.63458
KLHL20	0.266364	4.1765	5.66935	2.42151e-08	2.94147e-07	8.63308
PEX12	0.304938	3.36377	5.66824	2.43638e-08	2.95747e-07	8.6272
SF3B3	0.297021	5.90204	5.66579	2.46932e-08	2.99536e-07	8.61431
MOSMO	0.275492	2.84438	5.66469	2.48413e-08	3.00946e-07	8.60857
RPF2	0.264402	4.94829	5.66456	2.4859e-08	3.00946e-07	8.60789
KTI12	0.219186	2.97756	5.66455	2.48613e-08	3.00946e-07	8.6078
LRIF1	0.343731	4.03938	5.66365	2.49838e-08	3.01964e-07	8.60308
PCGF1	0.246977	5.2217	5.66356	2.49959e-08	3.01964e-07	8.60262
JRKL	0.313403	3.93763	5.66355	2.49974e-08	3.01964e-07	8.60256
NAV1	0.602104	3.60744	5.66282	2.50974e-08	3.02962e-07	8.59873
PIK3C2A	0.299021	4.28873	5.66244	2.51499e-08	3.03385e-07	8.59672
USP5	0.288515	7.07236	5.65978	2.55198e-08	3.07612e-07	8.58271
DCUN1D1	0.472905	5.07986	5.65966	2.55356e-08	3.07612e-07	8.58211
ZFP64	0.32442	4.28533	5.6594	2.5573e-08	3.07849e-07	8.58071
RAB3GAP2	0.245667	4.17428	5.65778	2.57999e-08	3.10365e-07	8.57223
STXBP1	0.444829	3.46852	5.65711	2.58949e-08	3.11293e-07	8.5687
USB1	0.266398	4.93304	5.6564	2.59954e-08	3.12285e-07	8.56498
VCL	0.366905	5.8333	5.65593	2.60631e-08	3.12883e-07	8.56249
PCLO	0.424574	1.47876	5.65496	2.62015e-08	3.14299e-07	8.5574
ADAM23	1.2006	4.43515	5.65485	2.62172e-08	3.14299e-07	8.55683
RPN1	0.251804	8.69191	5.65404	2.63333e-08	3.15474e-07	8.55259
ADAMTS1	0.606369	4.4996	5.65169	2.66747e-08	3.19344e-07	8.54022
USP31	0.394045	3.56965	5.65119	2.67479e-08	3.2e-07	8.53759
KLHL7	0.283196	4.23133	5.64919	2.70417e-08	3.23293e-07	8.52711
MFAP3	0.288777	2.90613	5.64902	2.70665e-08	3.23367e-07	8.52623
ATXN1L	0.318105	4.3614	5.64738	2.73112e-08	3.26067e-07	8.51759
PIGX	0.478222	5.52833	5.64686	2.73888e-08	3.26769e-07	8.51487
PPP2R2C	0.819622	3.28409	5.64395	2.78279e-08	3.31781e-07	8.4996
GAA	0.42619	6.79795	5.64378	2.78535e-08	3.31827e-07	8.49872
SCD	0.543781	8.33863	5.64367	2.78699e-08	3.31827e-07	8.49815
SOX12	0.475757	4.91484	5.64225	2.80868e-08	3.3399e-07	8.49071
RNF168	0.477321	5.11264	5.64223	2.80899e-08	3.3399e-07	8.49061
AIFM1	0.240512	3.5814	5.64203	2.81217e-08	3.34139e-07	8.48952
SLC9A6	0.247912	3.15374	5.6416	2.8188e-08	3.34619e-07	8.48726
TMCO1	0.267366	6.14498	5.64151	2.82005e-08	3.34619e-07	8.48683
CREG1	0.503673	7.41733	5.63988	2.84533e-08	3.37388e-07	8.47827
CACNA2D1	0.685057	3.1104	5.63945	2.85206e-08	3.37956e-07	8.47601
RPS6KA3	0.328399	4.71516	5.63838	2.86877e-08	3.39705e-07	8.4704
PTPRD	0.707374	1.96741	5.63797	2.87517e-08	3.40232e-07	8.46826
GCC2	0.268178	3.14707	5.63768	2.87978e-08	3.40546e-07	8.46672
DTL	0.424484	4.42534	5.63754	2.88184e-08	3.40558e-07	8.46603
CDK4	0.35829	6.59042	5.63622	2.90277e-08	3.42799e-07	8.45909
UBE2K	0.260645	5.88944	5.63598	2.90655e-08	3.43012e-07	8.45784
CSNK1A1	0.279641	5.17857	5.63437	2.93222e-08	3.45807e-07	8.4494
FOXK1	0.413442	4.48695	5.63413	2.9361e-08	3.4603e-07	8.44814
MCM6	0.348259	5.96949	5.63288	2.95618e-08	3.48161e-07	8.44159
BARX1	1.10508	3.0653	5.63257	2.96112e-08	3.48508e-07	8.43999
PPP2R5D	0.301734	4.86662	5.63177	2.97405e-08	3.49793e-07	8.43581
GPATCH11	0.243504	3.77129	5.63056	2.99385e-08	3.51884e-07	8.42944
SEC61B	0.219044	7.59356	5.62996	3.0036e-08	3.52791e-07	8.42632
AVL9	0.269707	3.77933	5.62866	3.02488e-08	3.55051e-07	8.41955
PCNX1	0.284285	3.51786	5.62851	3.02748e-08	3.55117e-07	8.41872
DDX23	0.222544	6.34924	5.62616	3.06648e-08	3.59449e-07	8.40644
SQLE	0.441378	6.339	5.62557	3.07628e-08	3.60356e-07	8.40338
RPRD2	0.317357	4.76862	5.6253	3.08081e-08	3.60643e-07	8.40197
PLD6	0.38108	2.69611	5.62428	3.09804e-08	3.62417e-07	8.39662
FOXK2	0.325985	4.95034	5.62387	3.10502e-08	3.62831e-07	8.39446
APBA2	0.576885	2.91207	5.62382	3.10575e-08	3.62831e-07	8.39423
LSG1	0.388895	6.10289	5.62212	3.13475e-08	3.65973e-07	8.38531
TWSG1	0.366244	5.61104	5.62166	3.14254e-08	3.66637e-07	8.38293
YIPF3	0.230385	6.92508	5.62026	3.16653e-08	3.69189e-07	8.37563
LEMD3	0.304532	4.58867	5.6198	3.17458e-08	3.69879e-07	8.3732
FBXL18	0.312346	2.29254	5.6186	3.19535e-08	3.7205e-07	8.36694
UTP3	0.292594	5.62741	5.61689	3.22523e-08	3.75277e-07	8.35801
S100A10	0.457503	10.0003	5.61563	3.24745e-08	3.77612e-07	8.35142
STK40	0.333001	5.32511	5.61452	3.26712e-08	3.79645e-07	8.34563
POLR1A	0.331194	4.31414	5.61384	3.27914e-08	3.80787e-07	8.3421
RNF215	0.296409	2.63706	5.61293	3.29554e-08	3.82437e-07	8.33732
PTAR1	0.298905	3.30627	5.6111	3.32845e-08	3.85998e-07	8.32778
WDR82	0.217108	6.11613	5.60971	3.35367e-08	3.88578e-07	8.32054
GNS	0.316313	6.57263	5.60963	3.35516e-08	3.88578e-07	8.32012
UBFD1	0.277834	4.80834	5.60941	3.35921e-08	3.88611e-07	8.31896
VPS37A	0.255099	3.98333	5.60937	3.35991e-08	3.88611e-07	8.31876
RBBP5	0.256112	4.73029	5.60813	3.38267e-08	3.90984e-07	8.31228
STC1	0.626088	4.59066	5.60535	3.43407e-08	3.96661e-07	8.29781
FAM83G	0.447416	4.02017	5.60447	3.45055e-08	3.983e-07	8.29322
NUCKS1	0.32104	7.63144	5.60375	3.46409e-08	3.99598e-07	8.28946
CAD	0.38745	5.37636	5.60135	3.50945e-08	4.04563e-07	8.27698
LIMA1	0.405906	6.43799	5.59899	3.55471e-08	4.09509e-07	8.26469
ELK1	0.270064	5.64036	5.59842	3.56572e-08	4.10506e-07	8.26172
CD44	0.481298	7.59484	5.59806	3.57281e-08	4.1105e-07	8.25982
PHLDB2	0.618728	4.26833	5.59604	3.61224e-08	4.15312e-07	8.24929
SCAP	0.251974	5.3945	5.5945	3.64246e-08	4.1851e-07	8.2413
MELK	0.469887	4.98101	5.59153	3.70154e-08	4.24857e-07	8.22586
LRP4	0.66107	3.598	5.59148	3.7027e-08	4.24857e-07	8.22556
CRAT	0.479045	4.81134	5.59126	3.70707e-08	4.24857e-07	8.22443
PCNX3	0.30962	5.41907	5.59124	3.70746e-08	4.24857e-07	8.22433
FMNL2	0.378419	4.77154	5.59104	3.71151e-08	4.25041e-07	8.22328
AAGAB	0.265378	5.70532	5.58911	3.75056e-08	4.29231e-07	8.21324
SBDS	0.27019	6.86978	5.58781	3.7771e-08	4.31984e-07	8.20648
ZBTB26	0.328143	3.00596	5.58687	3.79636e-08	4.33873e-07	8.2016
ATXN1	0.304359	3.22481	5.58676	3.7986e-08	4.33873e-07	8.20103
EI24	0.277966	7.19275	5.58651	3.80376e-08	4.34089e-07	8.19973
UNC50	0.248727	5.76693	5.58642	3.80548e-08	4.34089e-07	8.1993
CLIP4	0.465718	4.38045	5.58505	3.83384e-08	4.37038e-07	8.19217
LRP6	0.40848	3.76133	5.58415	3.85264e-08	4.38893e-07	8.18748
SPATS2	0.255568	4.41702	5.58399	3.85596e-08	4.38984e-07	8.18666
FOXJ2	0.313041	4.55207	5.58351	3.86606e-08	4.39846e-07	8.18415
ATP2B1	0.538541	4.96797	5.58205	3.89681e-08	4.43056e-07	8.17655
ENAH	0.371359	5.32215	5.57987	3.94293e-08	4.48007e-07	8.16526
TRIO	0.430186	4.62701	5.57931	3.955e-08	4.49085e-07	8.16233
MNT	0.292116	3.2663	5.57891	3.96361e-08	4.49603e-07	8.16025
MAP3K21	0.417572	3.08912	5.57885	3.96473e-08	4.49603e-07	8.15997
UCHL1	1.158	6.45693	5.5772	4.00037e-08	4.53349e-07	8.15139
PDS5A	0.272068	5.11391	5.57703	4.0041e-08	4.53477e-07	8.1505
PPIG	0.259475	4.60313	5.57603	4.02572e-08	4.55629e-07	8.14533
RALB	0.418266	6.74886	5.57468	4.05531e-08	4.5868e-07	8.13831
FBXO30	0.313473	3.37608	5.57402	4.06969e-08	4.60008e-07	8.13491
GIGYF2	0.26756	3.77691	5.5722	4.10991e-08	4.64252e-07	8.12548
IGF2BP2	0.807154	5.4585	5.57139	4.12796e-08	4.65988e-07	8.12128
GTF2H1	0.257865	4.50027	5.57023	4.15391e-08	4.68614e-07	8.11527
TESK1	0.364323	5.50154	5.5695	4.17041e-08	4.70171e-07	8.11147
TMF1	0.219865	3.62252	5.56919	4.17752e-08	4.70668e-07	8.10983
NPTN	0.269785	6.83765	5.56814	4.2013e-08	4.7304e-07	8.10439
WNK1	0.353966	5.52992	5.56641	4.2407e-08	4.77161e-07	8.09544
HMGCS1	0.527649	5.80087	5.56629	4.24338e-08	4.77161e-07	8.09483
COPS3	0.302457	6.15765	5.56596	4.25104e-08	4.77714e-07	8.0931
KIF3B	0.314969	5.29146	5.56573	4.25624e-08	4.77905e-07	8.09193
AMER1	0.378327	2.80856	5.56564	4.25823e-08	4.77905e-07	8.09148
ITGA3	0.646346	6.01773	5.56537	4.26459e-08	4.7831e-07	8.09005
ZNF638	0.288711	4.57416	5.56503	4.27247e-08	4.78885e-07	8.08828
ZNF518B	0.375152	3.25314	5.5634	4.31012e-08	4.82724e-07	8.07987
MTDH	0.248563	6.27278	5.56331	4.31227e-08	4.82724e-07	8.07939
SAMD8	0.291581	4.22654	5.56295	4.32071e-08	4.83358e-07	8.07751
NRBF2	0.265999	5.62053	5.56259	4.32892e-08	4.83967e-07	8.07569
RBSN	0.230168	3.53912	5.56209	4.34066e-08	4.84967e-07	8.0731
PFKP	0.401762	5.75695	5.5615	4.35456e-08	4.86208e-07	8.07003
ME1	0.775009	5.89669	5.56109	4.36428e-08	4.86756e-07	8.06789
MYBBP1A	0.372346	5.36778	5.56106	4.36506e-08	4.86756e-07	8.06772
METAP2	0.236862	6.31057	5.56085	4.36991e-08	4.86985e-07	8.06665
RNF169	0.344049	3.08104	5.55978	4.39518e-08	4.89488e-07	8.06112
TBL1X	0.474465	4.52111	5.55907	4.41204e-08	4.91051e-07	8.05745
COL4A2	0.511603	6.00563	5.55881	4.41836e-08	4.91441e-07	8.05608
NCBP3	0.276296	3.46206	5.55841	4.42786e-08	4.91877e-07	8.05402
CSE1L	0.30655	7.21697	5.5584	4.42794e-08	4.91877e-07	8.054
SF1	0.249751	6.99665	5.55599	4.48607e-08	4.98017e-07	8.0415
HTATSF1	0.305642	6.44654	5.55555	4.49675e-08	4.98885e-07	8.03922
KRAS	0.337495	5.03667	5.55482	4.51427e-08	5.00509e-07	8.03549
ZDHHC4	0.299974	4.87037	5.5545	4.52207e-08	5.01054e-07	8.03383
AP1G1	0.243067	5.00555	5.55093	4.60994e-08	5.10466e-07	8.01538
CCDC47	0.285819	6.43597	5.55047	4.62155e-08	5.1113e-07	8.01297
CRELD2	0.297065	5.01864	5.55044	4.62233e-08	5.1113e-07	8.01281
CCT6A	0.358023	8.02742	5.55034	4.62474e-08	5.1113e-07	8.0123
FDPS	0.311689	5.35949	5.54996	4.63417e-08	5.11846e-07	8.01035
NDE1	0.355878	4.34306	5.54964	4.64213e-08	5.11876e-07	8.00871
NACC1	0.329939	5.89948	5.5496	4.64328e-08	5.11876e-07	8.00847
LRP11	0.233732	1.17626	5.54952	4.64526e-08	5.11876e-07	8.00806
NINJ1	0.339552	6.13945	5.54948	4.6462e-08	5.11876e-07	8.00787
KPNA6	0.271281	5.22792	5.54869	4.66594e-08	5.13725e-07	8.0038
COL4A1	0.467096	6.31891	5.54853	4.67018e-08	5.13867e-07	8.00293
GPATCH8	0.296887	4.52788	5.54337	4.80154e-08	5.27987e-07	7.97633
ADGRA3	0.382454	3.8119	5.54284	4.81543e-08	5.29181e-07	7.97356
SMYD4	0.289732	3.00526	5.54227	4.83012e-08	5.3046e-07	7.97064
ATMIN	0.25241	5.25855	5.54098	4.86376e-08	5.33818e-07	7.96399
MRPL10	0.257259	5.85726	5.53957	4.90075e-08	5.37267e-07	7.95672
SMARCA5	0.268549	5.50649	5.53955	4.90136e-08	5.37267e-07	7.9566
FZD9	0.486761	1.50446	5.53863	4.92574e-08	5.39599e-07	7.95185
HNRNPM	0.26235	7.13565	5.53762	4.95268e-08	5.42209e-07	7.94662
PFKFB4	0.447618	3.42943	5.53644	4.98412e-08	5.45308e-07	7.94055
HCFC1	0.354099	5.61447	5.53543	5.01116e-08	5.47923e-07	7.93536
MRPS35	0.323244	6.96451	5.53431	5.04137e-08	5.50879e-07	7.9296
TMEM185A	0.260412	3.26406	5.53015	5.15547e-08	5.62994e-07	7.90814
LEO1	0.267529	5.01419	5.5294	5.17637e-08	5.64922e-07	7.90427
TASP1	0.256839	3.98759	5.52784	5.21972e-08	5.68672e-07	7.89627
EXO1	0.397453	3.88291	5.52783	5.22008e-08	5.68672e-07	7.8962
COP1	0.303039	5.66915	5.52782	5.22053e-08	5.68672e-07	7.89612
TFIP11	0.286596	4.45186	5.52755	5.22802e-08	5.69132e-07	7.89475
ITFG1	0.277564	4.53719	5.52726	5.23625e-08	5.69671e-07	7.89324
SCN9A	0.718465	1.84821	5.52635	5.26174e-08	5.72087e-07	7.88859
NIPBL	0.355053	4.70948	5.5251	5.29711e-08	5.75573e-07	7.88216
PRKAR2A	0.25504	4.66083	5.52493	5.30204e-08	5.75749e-07	7.88127
DHX29	0.253331	4.54259	5.52333	5.34765e-08	5.8034e-07	7.87306
LUZP1	0.327018	4.04933	5.52271	5.36551e-08	5.81916e-07	7.86986
SLC25A38	0.233691	5.18261	5.52243	5.37364e-08	5.82434e-07	7.86841
MIA3	0.238385	4.47362	5.52206	5.38425e-08	5.83221e-07	7.86652
MFSD5	0.225169	5.73184	5.52173	5.39378e-08	5.83891e-07	7.86482
ERP29	0.26161	7.55762	5.52033	5.43469e-08	5.87954e-07	7.85758
MAGT1	0.282374	6.47401	5.51879	5.47971e-08	5.92456e-07	7.84967
CNTNAP2	0.879637	2.52774	5.5185	5.48805e-08	5.92989e-07	7.84822
ADAM12	0.621494	3.69441	5.51778	5.50953e-08	5.9494e-07	7.84447
MICA	0.340166	4.15043	5.51765	5.51318e-08	5.94965e-07	7.84384
CDC25B	0.414631	6.54413	5.51503	5.59124e-08	6.03016e-07	7.83036
PSMC2	0.253381	5.57418	5.51489	5.59531e-08	6.03081e-07	7.82966
EIF4G3	0.300923	4.75507	5.51454	5.60589e-08	6.03848e-07	7.82785
HABP4	0.288243	2.72901	5.51414	5.61792e-08	6.04769e-07	7.8258
SRSF9	0.242594	5.79558	5.51035	5.73334e-08	6.16812e-07	7.8063
RABL6	0.30828	4.81396	5.5102	5.73785e-08	6.16916e-07	7.80555
ARMCX3	0.350172	5.1441	5.50942	5.76179e-08	6.19107e-07	7.80156
MON1B	0.251935	4.43876	5.50922	5.76812e-08	6.19405e-07	7.80051
KIF21A	0.460669	3.79129	5.50807	5.80354e-08	6.22825e-07	7.79464
LRFN3	0.395479	3.71521	5.50657	5.85049e-08	6.27476e-07	7.78692
B4GALT6	0.466603	2.54066	5.50598	5.86909e-08	6.29084e-07	7.78387
E2F6	0.292821	3.91692	5.50233	5.9849e-08	6.41102e-07	7.76515
LRPPRC	0.305306	6.01053	5.50206	5.99356e-08	6.41636e-07	7.76376
UAP1L1	0.418644	4.09349	5.50162	6.00763e-08	6.42746e-07	7.76151
PATJ	0.292065	4.0157	5.50088	6.03149e-08	6.44903e-07	7.75771
ST3GAL1	0.518286	4.90609	5.50027	6.05098e-08	6.46589e-07	7.75462
ABHD15	0.326257	4.12065	5.49943	6.07842e-08	6.48738e-07	7.75029
ZFP91	0.237454	5.62154	5.49942	6.07854e-08	6.48738e-07	7.75027
UBE2L3	0.269173	6.70523	5.49888	6.0961e-08	6.50213e-07	7.7475
SLC35F2	0.532084	4.73165	5.49817	6.11926e-08	6.52218e-07	7.74387
SLC12A8	0.414402	4.42815	5.49808	6.12238e-08	6.52218e-07	7.74338
AP5S1	0.231126	3.36255	5.49743	6.1437e-08	6.54088e-07	7.74005
R3HDM1	0.277649	4.37518	5.49635	6.17919e-08	6.57465e-07	7.73453
UHRF1BP1	0.303263	3.61964	5.49588	6.19493e-08	6.58736e-07	7.73209
GOLPH3	0.283844	7.51823	5.4951	6.22083e-08	6.61086e-07	7.72809
ABHD4	0.453419	5.62171	5.49458	6.23786e-08	6.62492e-07	7.72547
GDI1	0.286766	6.66955	5.49351	6.27391e-08	6.65914e-07	7.71995
PIGW	0.319437	4.03481	5.49274	6.29952e-08	6.68225e-07	7.71605
TPM4	0.303421	7.28263	5.4914	6.34489e-08	6.72628e-07	7.70917
POLR1F	0.271268	4.6868	5.49077	6.3662e-08	6.74476e-07	7.70596
GUF1	0.309631	4.32587	5.48922	6.41923e-08	6.79271e-07	7.69801
GART	0.290736	5.30996	5.48922	6.41926e-08	6.79271e-07	7.698
ENTPD6	0.316757	5.28531	5.48706	6.49349e-08	6.86709e-07	7.68698
FBXO28	0.242356	4.91887	5.4866	6.50946e-08	6.87979e-07	7.68463
ARIH2	0.197454	4.33046	5.48613	6.52586e-08	6.89294e-07	7.68222
SEC22C	0.214726	3.73593	5.48596	6.53196e-08	6.8952e-07	7.68132
MIER2	0.250777	3.19151	5.4856	6.54429e-08	6.90403e-07	7.67952
PTPDC1	0.271376	2.67745	5.48541	6.55094e-08	6.90686e-07	7.67854
CNNM4	0.314536	4.61989	5.48181	6.67796e-08	7.03651e-07	7.66014
TDRD7	0.365738	4.02508	5.48046	6.72639e-08	7.08326e-07	7.65322
TFCP2	0.260047	5.50395	5.4798	6.75016e-08	7.104e-07	7.64984
NDRG1	0.668099	8.39252	5.47924	6.77037e-08	7.12096e-07	7.64697
LSM14A	0.304462	6.75946	5.47835	6.8026e-08	7.15054e-07	7.64242
CASK	0.352042	3.89684	5.47664	6.86483e-08	7.21159e-07	7.6337
NCEH1	0.468008	4.99641	5.47611	6.88411e-08	7.22749e-07	7.63101
RASAL2	0.313337	3.05517	5.47527	6.91491e-08	7.25544e-07	7.62673
DCUN1D5	0.295732	3.56515	5.47495	6.92673e-08	7.26346e-07	7.6251
RITA1	0.255502	5.01706	5.47451	6.94317e-08	7.27633e-07	7.62282
METTL5	0.252703	4.99046	5.47393	6.9645e-08	7.29429e-07	7.61989
TSG101	0.246703	5.96961	5.47364	6.9752e-08	7.3011e-07	7.61841
PDP2	0.297353	2.97229	5.47279	7.007e-08	7.32998e-07	7.61406
F2RL1	0.59216	5.00013	5.47176	7.04544e-08	7.36577e-07	7.60881
XRCC6	0.273423	8.80546	5.47138	7.05989e-08	7.37644e-07	7.60685
TEX2	0.295703	4.4625	5.47111	7.07012e-08	7.3827e-07	7.60546
NUP133	0.264324	5.16883	5.46793	7.19064e-08	7.50405e-07	7.58927
ZNF609	0.34992	4.11666	5.46763	7.2022e-08	7.5116e-07	7.58773
SF3A1	0.272661	6.3429	5.46702	7.22564e-08	7.53154e-07	7.58462
ATXN2L	0.30446	6.32834	5.46664	7.24017e-08	7.54217e-07	7.58269
ZNF280C	0.365204	3.04636	5.46412	7.33805e-08	7.63956e-07	7.56983
POMT2	0.275183	3.20266	5.46385	7.34851e-08	7.64588e-07	7.56846
TENM2	0.955652	2.94072	5.46355	7.36005e-08	7.65331e-07	7.56696
ZNF800	0.254414	3.74656	5.46303	7.3807e-08	7.66416e-07	7.56428
AIMP2	0.289813	4.92106	5.46301	7.38124e-08	7.66416e-07	7.56421
CYP51A1	0.344492	1.78632	5.46295	7.38369e-08	7.66416e-07	7.56389
WBP11	0.279306	6.31364	5.46248	7.40217e-08	7.67876e-07	7.56149
SRFBP1	0.229549	3.67659	5.46231	7.40881e-08	7.67894e-07	7.56063
REST	0.263452	4.10923	5.46225	7.41116e-08	7.67894e-07	7.56033
MAP3K7	0.246809	4.77141	5.46144	7.44313e-08	7.70538e-07	7.55621
PDCD7	0.272204	4.76027	5.46134	7.44731e-08	7.70538e-07	7.55567
SUZ12	0.335085	4.90249	5.46127	7.44996e-08	7.70538e-07	7.55533
SMURF2	0.279003	4.26437	5.46111	7.45629e-08	7.70608e-07	7.55451
ZSCAN29	0.289806	3.67555	5.46103	7.4595e-08	7.70608e-07	7.5541
ERCC6L	0.387564	2.86168	5.4601	7.49632e-08	7.73953e-07	7.54938
TTPAL	0.306682	4.08425	5.45988	7.50524e-08	7.74414e-07	7.54825
TUBGCP4	0.271819	2.43278	5.45961	7.51619e-08	7.75085e-07	7.54685
PCYT1B	0.614063	1.82218	5.4593	7.52848e-08	7.75893e-07	7.54528
TLK1	0.281124	4.62954	5.45862	7.55555e-08	7.78222e-07	7.54184
RPRD1B	0.272775	5.09066	5.45843	7.56341e-08	7.7857e-07	7.54085
HEXB	0.253892	6.03559	5.45041	7.89233e-08	8.1168e-07	7.50007
DNAJC9	0.269724	4.00455	5.45037	7.89438e-08	8.1168e-07	7.49982
ASCC3	0.287658	4.17048	5.44772	8.0062e-08	8.22692e-07	7.48635
TMEM30A	0.275506	6.98617	5.44701	8.03627e-08	8.25295e-07	7.48276
CNPY3	0.273938	7.38521	5.4468	8.04507e-08	8.25711e-07	7.48171
ACKR1	-0.751155	3.03735	-5.44514	8.11625e-08	8.32525e-07	7.47327
TOX4	0.246744	5.2159	5.44479	8.1314e-08	8.33588e-07	7.47149
TMED7	0.259217	6.00666	5.44444	8.14661e-08	8.34656e-07	7.4697
ZNF507	0.319372	3.43015	5.44415	8.15888e-08	8.35421e-07	7.46825
CBL	0.302364	3.68714	5.44156	8.27182e-08	8.46487e-07	7.45509
C6orf47	0.243068	4.92967	5.44121	8.28706e-08	8.47549e-07	7.45332
RNF217	0.469798	3.52107	5.44041	8.32253e-08	8.50677e-07	7.44923
GMPS	0.356502	5.81015	5.43987	8.34623e-08	8.52599e-07	7.44651
MTRR	0.290032	4.41805	5.43942	8.36645e-08	8.54163e-07	7.44419
NOB1	0.279134	5.95964	5.43858	8.40375e-08	8.57469e-07	7.43993
ZNHIT6	0.25037	3.9408	5.438	8.42949e-08	8.59591e-07	7.437
KAT7	0.270816	3.94775	5.43738	8.45706e-08	8.61897e-07	7.43387
GPR180	0.277105	3.13123	5.43691	8.47846e-08	8.63171e-07	7.43145
TMEM209	0.298437	4.27748	5.43688	8.47948e-08	8.63171e-07	7.43134
PMS2	0.277412	3.17372	5.43615	8.5125e-08	8.66026e-07	7.42762
THRAP3	0.241141	6.71949	5.43597	8.52069e-08	8.66353e-07	7.42669
YLPM1	0.323369	4.27373	5.43547	8.543e-08	8.68114e-07	7.42419
ECE1	0.442138	6.89417	5.4349	8.56893e-08	8.70241e-07	7.42129
ZDHHC5	0.26212	6.67395	5.43389	8.61502e-08	8.74412e-07	7.41615
DEK	0.336557	6.43836	5.43362	8.62711e-08	8.75129e-07	7.41481
UTP14A	0.253788	4.42606	5.43304	8.6539e-08	8.77335e-07	7.41184
MYO1B	0.401591	5.52985	5.43284	8.66293e-08	8.7774e-07	7.41084
MED21	0.308143	5.21105	5.43123	8.7372e-08	8.84437e-07	7.40266
B4GALT1	0.358501	7.38977	5.43119	8.73919e-08	8.84437e-07	7.40244
AEBP2	0.325593	4.81428	5.43083	8.75571e-08	8.85593e-07	7.40064
RBM19	0.445636	4.74642	5.42923	8.83012e-08	8.92601e-07	7.39253
SLC16A3	0.44358	5.01915	5.42898	8.84155e-08	8.93238e-07	7.39129
GAN	0.338861	2.68071	5.42743	8.91474e-08	9.00109e-07	7.3834
SLC6A8	0.685734	7.11099	5.42438	9.05952e-08	9.14198e-07	7.36797
PDGFC	0.50619	3.85106	5.42405	9.07513e-08	9.15242e-07	7.36632
VAPB	0.256985	4.661	5.42285	9.13327e-08	9.20572e-07	7.3602
OSBPL10	0.295148	2.53197	5.42205	9.17188e-08	9.23929e-07	7.35617
KIAA1614	0.258746	1.12464	5.42187	9.18041e-08	9.24173e-07	7.35528
DSTYK	0.302096	3.52401	5.42178	9.18492e-08	9.24173e-07	7.3548
NCAPH	0.382655	4.12802	5.42157	9.19532e-08	9.24684e-07	7.35372
CAVIN1	0.456311	7.56216	5.41773	9.38345e-08	9.43058e-07	7.33433
MANF	0.254035	6.51601	5.41549	9.49533e-08	9.53752e-07	7.32298
BLMH	0.482492	5.27044	5.41317	9.61214e-08	9.64599e-07	7.31127
TENT4A	0.347942	4.83866	5.41309	9.61625e-08	9.64599e-07	7.31086
SLC7A1	0.396206	5.3803	5.41302	9.61995e-08	9.64599e-07	7.31049
TM7SF3	0.388423	6.01672	5.41268	9.63736e-08	9.65789e-07	7.30876
BUB1B	0.405381	4.26883	5.41142	9.70138e-08	9.71646e-07	7.30242
PGM1	0.344313	5.61732	5.41111	9.71712e-08	9.72662e-07	7.30087
TM9SF3	0.229558	6.53308	5.41053	9.74685e-08	9.75077e-07	7.29794
P3H3	0.522795	4.45087	5.41031	9.75855e-08	9.75687e-07	7.29679
PTK7	0.386042	6.10389	5.40613	9.97578e-08	9.96833e-07	7.27571
NRP2	0.545593	4.02585	5.40563	1.0002e-07	9.98881e-07	7.2732
NAB1	0.312193	5.10636	5.40538	1.00154e-07	9.9965e-07	7.27191
SURF2	0.300322	5.55455	5.40475	1.00489e-07	1.00191e-06	7.26872
MYH10	0.472013	4.80433	5.40474	1.00496e-07	1.00191e-06	7.26866
MKI67	0.462904	4.95824	5.40383	1.00977e-07	1.00613e-06	7.26409
SCRN3	0.27561	4.17126	5.40301	1.01414e-07	1.0099e-06	7.25995
TMEM181	0.292729	5.33975	5.4029	1.01473e-07	1.00992e-06	7.25939
COPZ2	0.534131	5.18377	5.40228	1.01806e-07	1.01265e-06	7.25626
SEC24D	0.325055	4.47723	5.40175	1.02089e-07	1.01489e-06	7.2536
TTC7A	0.293115	4.75993	5.39925	1.03444e-07	1.02777e-06	7.24097
FAM83D	0.50243	6.08276	5.39908	1.03535e-07	1.02809e-06	7.24013
ZNF618	0.398061	3.135	5.39736	1.04476e-07	1.03684e-06	7.23147
GTF2H3	0.260139	5.21812	5.39405	1.06314e-07	1.05448e-06	7.21477
GATAD2A	0.298206	5.61556	5.39286	1.06983e-07	1.0601e-06	7.20876
MRFAP1	0.238848	8.25574	5.39282	1.07003e-07	1.0601e-06	7.20859
RCN2	0.360556	5.33978	5.39219	1.07358e-07	1.06302e-06	7.20541
DNAJB6	0.25584	4.72725	5.39206	1.07431e-07	1.06313e-06	7.20477
MKRN1	0.28216	6.2582	5.39192	1.07512e-07	1.06333e-06	7.20405
SGCB	0.37738	4.58127	5.39164	1.07668e-07	1.06411e-06	7.20266
HELB	0.256303	1.5927	5.39157	1.07713e-07	1.06411e-06	7.20226
RAP2B	0.37404	5.55031	5.3911	1.07978e-07	1.06612e-06	7.19991
NCOA1	0.333849	4.61545	5.39006	1.08568e-07	1.07134e-06	7.19469
TKT	0.439972	7.13613	5.38987	1.0868e-07	1.07184e-06	7.1937
CHD8	0.295752	3.84455	5.38932	1.08993e-07	1.07432e-06	7.19095
EVI5	0.211311	3.06268	5.38912	1.09108e-07	1.07484e-06	7.18994
NFU1	0.280757	5.52905	5.38875	1.09317e-07	1.07629e-06	7.18811
PHF23	0.218836	5.50311	5.38758	1.09992e-07	1.08232e-06	7.18222
PARG	0.238878	3.9626	5.38734	1.10135e-07	1.08272e-06	7.18097
CEP295	0.304771	2.17248	5.38721	1.10208e-07	1.08272e-06	7.18034
POP1	0.315613	3.35934	5.38719	1.10219e-07	1.08272e-06	7.18024
MRGBP	0.279058	5.44794	5.38651	1.10617e-07	1.08602e-06	7.17679
LRP5	0.375105	5.71794	5.38627	1.10755e-07	1.08676e-06	7.1756
TASOR	0.230704	4.31312	5.38591	1.10966e-07	1.08822e-06	7.17378
ICMT	0.257192	6.17883	5.38535	1.11291e-07	1.09079e-06	7.17097
HPRT1	0.342201	6.90682	5.38524	1.11355e-07	1.09081e-06	7.17042
PIGM	0.292184	3.69163	5.38458	1.11742e-07	1.09398e-06	7.1671
RAB21	0.238713	4.18238	5.38381	1.12196e-07	1.09781e-06	7.16322
ABCB10	0.283805	4.3837	5.38305	1.12647e-07	1.1016e-06	7.15938
TMED2	0.256369	8.16558	5.38174	1.13422e-07	1.10856e-06	7.15282
ZMAT3	0.316738	3.66097	5.38133	1.13664e-07	1.11006e-06	7.15078
MAPK12	0.447344	3.12194	5.38127	1.13704e-07	1.11006e-06	7.15044
MGA	0.278411	3.24529	5.38021	1.14334e-07	1.11559e-06	7.14515
EMD	0.251201	6.89067	5.37939	1.14831e-07	1.11981e-06	7.141
KANSL3	0.270279	4.70562	5.37888	1.15137e-07	1.12217e-06	7.13845
PRRC2A	0.338364	6.98624	5.3781	1.15612e-07	1.12617e-06	7.13451
CHAC1	0.461694	3.55049	5.37754	1.15952e-07	1.12884e-06	7.1317
RHOQ	0.286586	4.86373	5.37695	1.16313e-07	1.13173e-06	7.12873
RELA	0.214706	6.06739	5.37664	1.16501e-07	1.13292e-06	7.12718
HACD3	0.325976	5.94116	5.37541	1.17252e-07	1.13959e-06	7.12103
CCT8	0.252808	7.32444	5.37492	1.17559e-07	1.14193e-06	7.11853
SF3B2	0.244409	6.42233	5.37121	1.19864e-07	1.16368e-06	7.09994
UBN1	0.306449	4.95362	5.36915	1.21167e-07	1.17567e-06	7.0896
DDX10	0.295342	3.85447	5.36882	1.21375e-07	1.17704e-06	7.08795
DHX16	0.25952	5.49947	5.36821	1.21765e-07	1.18016e-06	7.08488
TOR2A	0.236364	3.82606	5.36723	1.22396e-07	1.18562e-06	7.07993
PPP1R12A	0.217513	4.34173	5.36667	1.22753e-07	1.18841e-06	7.07715
ALDOC	0.547148	5.54562	5.3645	1.24158e-07	1.20134e-06	7.06626
KIF11	0.367704	4.90093	5.3626	1.25401e-07	1.2127e-06	7.05672
FKBP14	0.304509	3.87295	5.36191	1.25853e-07	1.21639e-06	7.05329
INTS2	0.282082	3.19308	5.3618	1.25925e-07	1.21642e-06	7.05273
UBE2O	0.316519	5.07374	5.36142	1.2618e-07	1.2182e-06	7.0508
POGLUT2	0.360183	3.63352	5.3606	1.26719e-07	1.22246e-06	7.04672
TARDBP	0.211681	5.72974	5.36054	1.26762e-07	1.22246e-06	7.04639
TSN	0.256688	6.36748	5.35902	1.27769e-07	1.23149e-06	7.03882
EXOC8	0.224583	3.72239	5.35627	1.29628e-07	1.24871e-06	7.025
MTMR1	0.337614	5.12388	5.35558	1.30094e-07	1.25252e-06	7.02156
SPOP	0.219359	4.88652	5.35526	1.30308e-07	1.25388e-06	7.01999
BORCS5	0.271123	3.113	5.3536	1.31445e-07	1.26413e-06	7.01168
IL13RA1	0.295486	6.47206	5.35169	1.32768e-07	1.27614e-06	7.0021
SLC38A1	0.386528	5.83008	5.35004	1.33913e-07	1.28644e-06	6.99388
SLC4A2	0.330136	4.70629	5.34968	1.34171e-07	1.28761e-06	6.99204
FKBP10	0.61814	6.45835	5.34966	1.34183e-07	1.28761e-06	6.99195
RPS6KA6	0.563462	1.44337	5.3492	1.34509e-07	1.29003e-06	6.98963
DHX30	0.230809	5.08228	5.34821	1.35201e-07	1.29595e-06	6.98472
MYH9	0.423282	9.0647	5.34781	1.35488e-07	1.29759e-06	6.98269
FKBP1A	0.241235	7.07036	5.34776	1.35522e-07	1.29759e-06	6.98245
PDCD10	0.357661	6.3439	5.34735	1.35815e-07	1.29969e-06	6.98038
ASH1L	0.324426	4.25251	5.34652	1.364e-07	1.3043e-06	6.97627
ADD2	0.785792	2.17903	5.34646	1.36447e-07	1.3043e-06	6.97594
UAP1	0.255917	5.91256	5.34611	1.36698e-07	1.30598e-06	6.97419
DCBLD2	0.469632	4.34595	5.3445	1.3785e-07	1.31627e-06	6.96615
ZCRB1	0.234438	4.26228	5.34415	1.38101e-07	1.3176e-06	6.96441
SESN2	0.323353	4.32365	5.3441	1.38141e-07	1.3176e-06	6.96413
SGO1	0.306307	2.33972	5.34308	1.38877e-07	1.32389e-06	6.95905
GAREM2	0.472614	3.19	5.34272	1.39133e-07	1.32561e-06	6.95729
KDM1B	0.335199	4.48161	5.34121	1.40239e-07	1.33542e-06	6.94971
RAB28	0.245883	4.56569	5.34082	1.40523e-07	1.33717e-06	6.94778
PLA2R1	0.504457	2.86148	5.34075	1.40577e-07	1.33717e-06	6.94741
PARP4	0.30962	5.19351	5.33943	1.41547e-07	1.34566e-06	6.94083
INSIG2	0.240381	4.56941	5.33831	1.4238e-07	1.35284e-06	6.93522
WDCP	0.290961	3.73879	5.33727	1.4315e-07	1.35942e-06	6.93005
RIPOR1	0.30659	4.40909	5.33714	1.43246e-07	1.35959e-06	6.92942
GATAD2B	0.281015	4.24777	5.33696	1.43382e-07	1.36013e-06	6.92851
RALA	0.22492	6.2349	5.33537	1.44574e-07	1.37069e-06	6.92059
PRKDC	0.379937	6.09378	5.33501	1.4485e-07	1.37257e-06	6.91876
SND1	0.244684	6.9931	5.33486	1.44963e-07	1.37289e-06	6.91802
MAP7D3	0.334756	2.89902	5.33255	1.4672e-07	1.38878e-06	6.90649
RTL6	0.361943	4.86014	5.32998	1.48694e-07	1.4067e-06	6.8937
SMIM10L1	0.304406	4.33239	5.3297	1.48912e-07	1.40766e-06	6.8923
C1orf216	0.247332	4.27046	5.32964	1.48957e-07	1.40766e-06	6.89201
PYGB	0.411069	6.96746	5.3284	1.49925e-07	1.41603e-06	6.88582
SAR1A	0.20356	5.6885	5.32642	1.51483e-07	1.42997e-06	6.87593
BORA	0.312038	3.05479	5.32326	1.53991e-07	1.45286e-06	6.86022
SOGA1	0.438104	4.53231	5.32303	1.54179e-07	1.45341e-06	6.85905
GOLGA5	0.246511	6.03223	5.32298	1.54216e-07	1.45341e-06	6.85882
AVEN	0.255269	3.68885	5.32281	1.54355e-07	1.45393e-06	6.85796
RASL10B	0.558961	1.83842	5.32086	1.55929e-07	1.46796e-06	6.84825
ZNF619	0.216777	1.97625	5.32064	1.56109e-07	1.46861e-06	6.84715
SFMBT1	0.272332	3.0844	5.32057	1.56167e-07	1.46861e-06	6.8468
TNIP2	0.258954	5.67125	5.32028	1.56402e-07	1.47002e-06	6.84536
CLSTN1	0.408903	8.02626	5.32003	1.56602e-07	1.47111e-06	6.84414
AFG3L2	0.31905	4.69637	5.31918	1.57294e-07	1.47681e-06	6.83992
NIT1	0.232602	4.73419	5.31872	1.57675e-07	1.47959e-06	6.8376
SBF2	0.281622	2.56456	5.31772	1.58497e-07	1.4865e-06	6.83263
RFC4	0.436597	5.87454	5.31756	1.58627e-07	1.48692e-06	6.83185
UBA6	0.299962	4.4483	5.31718	1.58938e-07	1.48904e-06	6.82997
SMAP1	0.277592	2.9534	5.31691	1.59167e-07	1.49038e-06	6.82859
KIAA1958	0.286081	1.72337	5.31655	1.59467e-07	1.49239e-06	6.82679
ZNF623	0.281039	4.35228	5.31628	1.59689e-07	1.49367e-06	6.82546
FOXO3B	0.272252	1.37441	5.3152	1.60587e-07	1.50126e-06	6.8201
UNC119B	0.329356	4.51179	5.31437	1.61278e-07	1.5069e-06	6.81599
MTFMT	0.253186	3.75727	5.31362	1.61907e-07	1.51197e-06	6.81227
MSN	0.390919	8.19077	5.31351	1.62003e-07	1.51206e-06	6.8117
MERTK	0.515934	4.27278	5.31319	1.62276e-07	1.51379e-06	6.81009
HM13	0.227075	6.29127	5.31192	1.63348e-07	1.52297e-06	6.80379
BCHE	0.789302	2.58998	5.31098	1.64144e-07	1.52958e-06	6.79914
C1orf112	0.310617	2.99264	5.31033	1.64705e-07	1.53398e-06	6.79588
SSRP1	0.27465	6.75434	5.30767	1.66993e-07	1.55447e-06	6.78268
ZC3H13	0.282504	4.30582	5.30484	1.69467e-07	1.57665e-06	6.76862
MCM3AP	0.32668	3.82388	5.30365	1.70517e-07	1.58557e-06	6.76271
SP1	0.242877	5.69816	5.30296	1.71131e-07	1.59043e-06	6.75928
ITCH	0.245746	4.68247	5.30238	1.71638e-07	1.59429e-06	6.75644
TXNRD1	0.74004	6.90186	5.30213	1.71862e-07	1.59553e-06	6.75519
SLC38A2	0.337546	7.38811	5.30075	1.73103e-07	1.60618e-06	6.74832
MMP14	0.435953	8.33409	5.30029	1.73517e-07	1.60917e-06	6.74603
SNRPB2	0.233722	6.0683	5.29985	1.73913e-07	1.61198e-06	6.74385
KIF20A	0.369359	4.84901	5.29933	1.7438e-07	1.61545e-06	6.74129
RRP15	0.247743	3.6382	5.29906	1.7462e-07	1.61681e-06	6.73997
PLEKHB2	0.222528	6.06099	5.29837	1.75254e-07	1.62182e-06	6.73651
FUBP1	0.256688	5.48594	5.29741	1.7612e-07	1.62897e-06	6.73179
SART3	0.247643	4.69319	5.29722	1.76298e-07	1.62975e-06	6.73082
KLHL18	0.191156	3.15662	5.29699	1.76504e-07	1.63079e-06	6.72971
ENOX2	0.261516	4.16396	5.29563	1.77761e-07	1.64153e-06	6.72292
CCNB1	0.367547	6.48692	5.29547	1.77904e-07	1.64198e-06	6.72215
RAB3B	0.671474	1.86343	5.2939	1.7936e-07	1.65454e-06	6.71436
EP300	0.335431	5.15258	5.29265	1.80527e-07	1.66359e-06	6.70816
PHTF2	0.27792	4.12488	5.29264	1.80532e-07	1.66359e-06	6.70813
CENPF	0.460649	4.70146	5.2924	1.80754e-07	1.66475e-06	6.70696
ERLEC1	0.243675	6.84457	5.29088	1.82185e-07	1.67705e-06	6.69941
PLXNA1	0.444464	5.83671	5.28932	1.83665e-07	1.68977e-06	6.69168
FAH	0.355718	3.8486	5.28748	1.85417e-07	1.70499e-06	6.6826
UBQLN4	0.274612	5.79205	5.28591	1.86935e-07	1.71804e-06	6.6748
SLC48A1	0.375629	4.86595	5.28555	1.87282e-07	1.72033e-06	6.67303
TASOR2	0.274309	4.36701	5.28536	1.87467e-07	1.72112e-06	6.67209
NOL11	0.272531	5.62063	5.284	1.88789e-07	1.73234e-06	6.66537
CHSY1	0.322505	5.3394	5.28073	1.92014e-07	1.761e-06	6.64917
SLC35D1	0.285433	3.78111	5.27821	1.94526e-07	1.7831e-06	6.63674
WIPI2	0.218045	5.1478	5.27756	1.95183e-07	1.78769e-06	6.63352
SCYL1	0.225502	6.1809	5.27751	1.95232e-07	1.78769e-06	6.63328
B3GLCT	0.296302	3.59217	5.27706	1.95682e-07	1.79087e-06	6.63108
ZNF770	0.382004	4.38717	5.27667	1.96087e-07	1.79363e-06	6.6291
ZPR1	0.237751	4.66906	5.27568	1.97088e-07	1.80185e-06	6.62423
PTCD2	0.18603	1.86412	5.27528	1.97497e-07	1.80463e-06	6.62225
ZZZ3	0.240925	3.9953	5.27509	1.97691e-07	1.80488e-06	6.62131
PSEN1	0.22103	4.85568	5.27505	1.97731e-07	1.80488e-06	6.62112
RICTOR	0.296703	3.42851	5.27473	1.98056e-07	1.8069e-06	6.61955
MSTO1	0.276979	3.44481	5.27327	1.99558e-07	1.81965e-06	6.61232
MARVELD1	0.367648	6.12905	5.27222	2.00642e-07	1.82857e-06	6.60715
PATL1	0.276999	5.77769	5.27078	2.02143e-07	1.84128e-06	6.60002
CYB5B	0.268331	5.29305	5.27064	2.02287e-07	1.84164e-06	6.59934
VBP1	0.279321	6.61758	5.26896	2.04044e-07	1.85666e-06	6.59107
TMEM104	0.251507	4.44596	5.26773	2.05344e-07	1.86751e-06	6.585
PGF	0.544232	4.05697	5.26757	2.05511e-07	1.86806e-06	6.58422
SRXN1	0.185262	0.316124	5.26317	2.1023e-07	1.90996e-06	6.56252
HMGXB3	0.221845	4.89056	5.26293	2.10496e-07	1.91111e-06	6.56131
SACS	0.320127	2.22589	5.26278	2.10657e-07	1.91111e-06	6.56058
TJP1	0.308564	4.78456	5.26275	2.10687e-07	1.91111e-06	6.56044
TEAD4	0.356653	4.92933	5.26241	2.11062e-07	1.91352e-06	6.55874
NKIRAS1	0.190237	2.63627	5.25982	2.13897e-07	1.93821e-06	6.54599
BBS7	0.229487	3.13114	5.25943	2.14323e-07	1.94106e-06	6.54409
PACC1	0.356166	4.48948	5.25789	2.1603e-07	1.9555e-06	6.5365
ATP8B3	0.418605	1.59773	5.25528	2.18961e-07	1.98101e-06	6.52362
MPLKIP	0.247103	3.86884	5.25357	2.20888e-07	1.9974e-06	6.51525
VPS35	0.244832	5.59477	5.25317	2.21343e-07	2.00047e-06	6.51328
SDF4	0.244503	6.84425	5.25095	2.23891e-07	2.02245e-06	6.50234
DYNC1LI2	0.296455	4.99397	5.25039	2.24542e-07	2.02728e-06	6.49957
RLF	0.287171	4.22839	5.25001	2.24972e-07	2.03011e-06	6.49774
MICALL1	0.441986	5.86239	5.24978	2.25244e-07	2.03151e-06	6.49658
SPOPL	0.227753	3.87189	5.24944	2.25638e-07	2.03401e-06	6.49491
CTCF	0.220952	4.53285	5.24887	2.26299e-07	2.03892e-06	6.49211
CCDC93	0.269205	3.8631	5.24767	2.27697e-07	2.05045e-06	6.48623
ZNF207	0.192163	5.05162	5.24654	2.29026e-07	2.06031e-06	6.48067
ASCC1	0.25204	4.14721	5.24654	2.29029e-07	2.06031e-06	6.48065
EGFR	0.664611	5.94943	5.2462	2.29434e-07	2.06289e-06	6.47896
NOP56	0.297986	6.59756	5.24577	2.29939e-07	2.06636e-06	6.47686
NEO1	0.465712	5.11037	5.24519	2.3062e-07	2.07142e-06	6.47404
SKIL	0.350561	5.42915	5.24497	2.30882e-07	2.07217e-06	6.47295
ZBTB38	0.361136	4.62382	5.24492	2.30942e-07	2.07217e-06	6.4727
FEN1	0.340993	6.27152	5.24438	2.31583e-07	2.07685e-06	6.47005
REP15	0.106939	0.276888	5.24415	2.31858e-07	2.07693e-06	6.46892
NRARP	0.588546	5.20121	5.24402	2.32015e-07	2.07693e-06	6.46827
CAND1	0.287437	5.42447	5.24399	2.32051e-07	2.07693e-06	6.46813
NSMCE3	0.248079	3.86627	5.24398	2.32069e-07	2.07693e-06	6.46805
FBXO22	0.227448	3.37796	5.24349	2.32651e-07	2.08106e-06	6.46566
PTK2	0.265701	5.05769	5.24257	2.33754e-07	2.08986e-06	6.46114
GLT8D1	0.188531	5.11167	5.24094	2.35714e-07	2.1063e-06	6.45316
THUMPD3	0.240641	4.13723	5.24079	2.35897e-07	2.10685e-06	6.45241
PITPNB	0.261625	6.07674	5.23849	2.38708e-07	2.13086e-06	6.44109
PRKCSH	0.267762	7.75791	5.23827	2.38976e-07	2.13216e-06	6.44002
CHRM3	0.445244	2.07436	5.23797	2.3934e-07	2.13432e-06	6.43857
ZBED4	0.312647	4.43402	5.23725	2.40229e-07	2.1405e-06	6.43502
TGS1	0.279352	4.85931	5.23721	2.40278e-07	2.1405e-06	6.43483
BACE1	0.303061	3.03406	5.2371	2.40413e-07	2.1406e-06	6.43429
YME1L1	0.216848	6.166	5.23663	2.40988e-07	2.14462e-06	6.43201
NUP37	0.267531	4.55243	5.2359	2.41899e-07	2.15163e-06	6.4284
VPS41	0.240398	4.76697	5.23572	2.42126e-07	2.15255e-06	6.42751
PTPRK	0.358162	5.22576	5.23533	2.42602e-07	2.15568e-06	6.42563
ZNF148	0.285165	4.39568	5.2352	2.42764e-07	2.15594e-06	6.42499
SHISA4	0.453288	4.08362	5.23511	2.42879e-07	2.15594e-06	6.42454
RUBCN	0.282899	2.54643	5.23448	2.43672e-07	2.16187e-06	6.42142
MAML1	0.292048	4.9344	5.23384	2.44467e-07	2.16783e-06	6.41831
TIPRL	0.258765	6.00435	5.23323	2.45241e-07	2.17358e-06	6.41529
PAXIP1	0.282327	2.72078	5.23298	2.45553e-07	2.17524e-06	6.41408
SFT2D2	0.246941	4.72779	5.23233	2.46376e-07	2.18141e-06	6.41088
RPTOR	0.295238	3.84935	5.23178	2.47072e-07	2.18647e-06	6.40818
SPNS3	-0.201988	0.683111	-5.23101	2.4805e-07	2.19401e-06	6.40441
FAM136A	0.279477	5.69951	5.23033	2.48917e-07	2.20056e-06	6.40107
ITPKA	0.504291	2.25466	5.23006	2.49254e-07	2.20242e-06	6.39978
CS	0.238482	6.50335	5.22936	2.50158e-07	2.20928e-06	6.39632
STIM1	0.312115	5.30679	5.22921	2.50351e-07	2.20987e-06	6.39558
ZNF526	0.250937	3.55577	5.22737	2.52715e-07	2.22961e-06	6.3866
AQR	0.252046	3.84906	5.22702	2.53168e-07	2.23247e-06	6.38489
NUP88	0.288899	4.39566	5.22633	2.54066e-07	2.23926e-06	6.38151
RBM12B	0.282621	2.9966	5.22598	2.54522e-07	2.24213e-06	6.3798
LONP1	0.320141	6.09055	5.22405	2.57062e-07	2.26336e-06	6.37031
ZNF143	0.173606	3.91401	5.22325	2.58111e-07	2.27145e-06	6.36641
ANKRD27	0.299361	4.52798	5.22278	2.58733e-07	2.27578e-06	6.36412
SCARB1	0.358781	4.30398	5.22088	2.61267e-07	2.2969e-06	6.3548
WWP1	0.275589	5.04709	5.22034	2.61991e-07	2.30211e-06	6.35216
CCNYL1	0.281984	4.06799	5.21897	2.63828e-07	2.31708e-06	6.34548
ZBTB4	0.278191	5.50428	5.21719	2.66245e-07	2.33713e-06	6.33677
GOLGB1	0.323203	5.2834	5.21599	2.67884e-07	2.35033e-06	6.33091
MAN2B2	0.311815	4.59998	5.21522	2.68949e-07	2.35849e-06	6.32711
WDR36	0.211217	4.08817	5.21505	2.69184e-07	2.35936e-06	6.32628
USP13	0.421453	3.58257	5.21461	2.69781e-07	2.3634e-06	6.32416
TUBA1B	0.282893	6.99892	5.21131	2.7438e-07	2.40248e-06	6.30801
NT5M	0.457004	2.73031	5.21023	2.75903e-07	2.4146e-06	6.30272
ATP6V1G1	0.237022	6.82393	5.20985	2.76435e-07	2.41748e-06	6.30089
BOLA3	0.302491	3.14867	5.2098	2.76509e-07	2.41748e-06	6.30063
AP5B1	0.307534	4.54083	5.20927	2.77253e-07	2.42277e-06	6.29806
SRPK1	0.274276	4.48622	5.20781	2.79331e-07	2.4397e-06	6.29093
ASPH	0.505606	5.40711	5.20749	2.79787e-07	2.44245e-06	6.28937
NAGLU	0.256084	5.24084	5.20671	2.80909e-07	2.45102e-06	6.28555
HSD17B12	0.272413	4.10702	5.2052	2.8309e-07	2.46881e-06	6.27816
AGPAT2	0.361565	6.59056	5.203	2.8629e-07	2.49547e-06	6.26742
BRIX1	0.326411	5.3491	5.20096	2.89278e-07	2.52025e-06	6.2575
[truncated: 15,409 more rows]
